1 **Title:** A multilayered post-GWAS assessment on genetic susceptibility to pancreatic  
2 cancer.

3

4 **Authors:** López de Maturana E (1)\*, Rodríguez JA (2)\*, Alonso L (1), Lao O (2),  
5 Molina-Montes E (1), Martín-Antoniano I (1), Gómez-Rubio P (1), Lawlor  
6 RT (3), Carrato A (4), Hidalgo M (5), Iglesias M (6), Molero X (7), Löhr  
7 M (8), Michalski CW (9), Perea J (10), O’Rourke M (11), Barberà VM (12),  
8 Tardón A (13), Farré A (14), Muñoz-Bellvís L (15), Crnogorac-Jurcevic T  
9 (16), Domínguez-Muñoz E (17), Gress T (18), Greenhalf W (19), Sharp L  
10 (20), Arnes L (21), Cecchini L (6), Balsells J (7), Costello E (19), Ilzarbe  
11 L (6), Kleeff J (9), Kong B (22), Márquez M (1), Mora J (14), O’Driscoll  
12 D (23), Scarpa A (3), Ye W (24), Yu J (24), PanGenEU Investigators (25),  
13 García-Closas M (26), Kogevinas M (27), Rothman N (26), Silverman D  
14 (26), SBC/EPICURO Investigators (28), Albanes D (26), Arslan AA (29),  
15 Beane-Freeman L (26), Bracci PM (30), Brennan P (31), Bueno-de-  
16 Mesquita B (32), Buring J (33), Canzian F (34), Du M (35), Gallinger S  
17 (36), Gaziano JM (37), Goodman PJ (38), Gunter M (31), LeMarchand L  
18 (39), Li D (40), Neale RE (41), Peters U (42), Petersen GM (43), Risch  
19 HA (44), Sánchez MJ (45), Shu XO (46), Thornquist MD (42),  
20 Visvanathan K (43), Zheng W (46), Chanock S (26), Easton D (47),  
21 Wolpin BM (48), Stolzenberg-Solomon RZ (26), Klein AP (49),  
22 Amundadottir LT (50), Marti-Renom MA (51), Real FX (52), Malats N  
23 (1).

24 \* Equal contributions

25

26

27 **Authors' affiliations:**

- 28 (1) Genetic and Molecular Epidemiology Group, Spanish National Cancer Research  
29 Center (CNIO), Madrid, and CIBERONC, Spain.
- 30 (2) CNAG-CRG, Centre for Genomic Regulation (CRG), Barcelona Institute of  
31 Science and Technology (BIST), Barcelona, Spain.
- 32 (3) ARC-Net Centre for Applied Research on Cancer and Department of Pathology  
33 and Diagnostics, University and Hospital trust of Verona, Verona, Italy.
- 34 (4) Department of Oncology, Ramón y Cajal University Hospital, IRYCIS, Alcala  
35 University, Madrid, and CIBERONC, Spain.
- 36 (5) Madrid-Norte-Sanchinarro Hospital, Madrid, Spain; and Weill Cornell Medicine,  
37 New York, USA.
- 38 (6) Hospital del Mar—Parc de Salut Mar, Barcelona, and CIBERONC, Spain.
- 39 (7) Hospital Universitari Vall d'Hebron, Vall d'Hebron Research Institute (VHIR),  
40 Barcelona, Universitat Autònoma de Barcelona, and CIBEREHD, Spain.
- 41 (8) Gastrocentrum, Karolinska Institutet and University Hospital, Stockholm,  
42 Sweden.
- 43 (9) Department of Surgery, Technical University of Munich, Munich; and  
44 Department of Visceral, Vascular and Endocrine Surgery, Martin-Luther-  
45 University Halle-WittenberHalle (Saale), Germany.
- 46 (10) Department of Surgery, Hospital 12 de Octubre; and Department of  
47 Surgery and Health Research Institute, Fundación Jiménez Díaz, Madrid, Spain.
- 48 (11) Centre for Public Health, Belfast, Queen's University Belfast, UK; and  
49 College of Public Health, The University of Iowa, Iowa City, IA, US.
- 50 (12) Molecular Genetics Laboratory, General University Hospital of Elche,  
51 Spain.
- 52 (13) Department of Medicine, Instituto Universitario de Oncología del  
53 Principado de Asturias (IUOPA), Instituto de Investigación Sanitaria del  
54 Principado de Asturias (ISPA), Oviedo, and CIBERESP, Spain.
- 55 (14) Department of Gastroenterology and Clinical Biochemistry, Hospital de  
56 la Santa Creu i Sant Pau, Barcelona, Spain.
- 57 (15) Department of Surgery, Hospital Universitario de Salamanca – IBSAL.  
58 Universidad de Salamanca and CIBERONC, Spain.
- 59 (16) Barts Cancer Institute, Centre for Molecular Oncology, Queen Mary  
60 University of London, London, UK.

- 61 (17) Department of Gastroenterology, University Clinical Hospital of Santiago  
62 de Compostela, Spain.
- 63 (18) Department of Gastroenterology, University Hospital of Giessen and  
64 Marburg, Marburg, Germany.
- 65 (19) Department of Molecular and Clinical Cancer Medicine, University of  
66 Liverpool, Liverpool, UK.
- 67 (20) National Cancer Registry Ireland and HRB Clinical Research Facility,  
68 University College Cork, Cork, Ireland; and Newcastle University, Institute of  
69 Health & Society, Newcastle, UK.
- 70 (21) Centre for Stem Cell Research and Developmental Biology, University of  
71 Copenhagen, Denmark; and Department of Genetics and Development, Columbia  
72 University Medical Center, New York, NY, US; Department of Systems Biology,  
73 Columbia University Medical Center, New York, NY, US.
- 74 (22) Department of Surgery, Technical University of Munich, Munich,  
75 Germany.
- 76 (23) National Cancer Registry Ireland and HRB Clinical Research Facility,  
77 University College Cork, Cork, Ireland.
- 78 (24) Department of Medical Epidemiology and Biostatistics, Karolinska  
79 Institutet, Stockholm, Sweden.
- 80 (25) PanGenEU Study investigators (Supplementary Annex 1)
- 81 (26) Division of Cancer Epidemiology and Genetics, National Cancer Institute,  
82 National Institutes of Health, Bethesda, MD, US.
- 83 (27) Institut Municipal d'Investigació Mèdica – Hospital del Mar, Centre de  
84 Recerca en Epidemiologia Ambiental (CREAL), Barcelona, and CIBERESP,  
85 Spain.
- 86 (28) SBC/EPICURO Investigators (Supplementary Annex 2)
- 87 (29) Department of Obstetrics and Gynecology, New York University School  
88 of Medicine, New York, NY; Department of Environmental Medicine, New York  
89 University School of Medicine, New York, NY; Department of Population  
90 Health, New York University School of Medicine, New York, NY, US.
- 91 (30) Department of Epidemiology and Biostatistics, University of California,  
92 San Francisco, CA, US.
- 93 (31) International Agency for Research on Cancer (IARC), Lyon, France.
- 94 (32) Dept. for Determinants of Chronic Diseases (DCD), National Institute for  
95 Public Health and the Environment (RIVM), Bilthoven, The Netherlands.

- 96 (33) Division of Preventive Medicine, Brigham and Women's Hospital,  
97 Boston, MA, US.
- 98 (34) Genomic Epidemiology Group, German Cancer Research Center (DKFZ),  
99 Heidelberg, Germany.
- 100 (35) Department of Epidemiology and Biostatistics, Memorial Sloan Kettering  
101 Cancer Center, New York, NY, US.
- 102 (36) Prosserman Centre for Population Health Research, Lunenfeld-  
103 Tanenbaum Research Institute, Sinai Health System, Toronto, ON, Canada.
- 104 (37) Departments of Medicine, Brigham and Women's Hospital, VA Boston  
105 and Harvard Medical School, Boston, MA, US.
- 106 (38) SWOG Statistical Center, Fred Hutchinson Cancer Research Center,  
107 Seattle, WA, US.
- 108 (39) Cancer Epidemiology Program, University of Hawaii Cancer Center,  
109 Honolulu, HI, US.
- 110 (40) University of Texas MD Anderson Cancer Center, Houston, TX, US.
- 111 (41) Population Health Department, QIMR Berghofer Medical Research  
112 Institute, Brisbane, Queensland, Australia.
- 113 (42) Division of Public Health Sciences, Fred Hutchinson Cancer Research  
114 Center, Seattle, WA, US.
- 115 (43) Department of Health Sciences Research, Mayo Clinic College of  
116 Medicine, Rochester, MN, US.
- 117 (44) Department of Chronic Disease Epidemiology, Yale School of Public  
118 Health, New Haven, CT, US.
- 119 (45) Escuela Andaluza de Salud Pública (EASP), Granada, Spain; Instituto de  
120 Investigación Biosanitaria Granada, Spain; Centro de Investigación Biomédica en  
121 Red de Epidemiología y Salud Pública (CIBERESP), Madrid, Spain; Universidad  
122 de Granada, Granada, Spain.
- 123 (46) Division of Epidemiology, Department of Medicine, Vanderbilt  
124 Epidemiology Center, Vanderbilt-Ingram Cancer Center, Vanderbilt University  
125 School of Medicine, Nashville, TN, US.
- 126 (47) Centre for Cancer Genetic Epidemiology, Department of Public Health  
127 and Primary Care, University of Cambridge, UK.
- 128 (48) Department Medical Oncology, Dana-Farber Cancer Institute, Boston, US.
- 129 (49) Department of Oncology, Sidney Kimmel Comprehensive Cancer Center,  
130 Johns Hopkins School of Medicine, Baltimore, MD, US.

131 (50) Laboratory of Translational Genomics, Division of Cancer Epidemiology  
132 and Genetics, National Cancer Institute, National Institutes of Health, Bethesda,  
133 MD, USA

134 (51) National Centre for Genomic Analysis (CNAG), Centre for Genomic  
135 Regulation (CRG), Barcelona Institute of Science and Technology (BIST);  
136 Universitat Pompeu Fabra (UPF); ICREA, Barcelona, Spain.

137 (52) Epithelial Carcinogenesis Group, Spanish National Cancer Research  
138 Centre (CNIO), Madrid; Departament de Ciències Experimentals i de la Salut,  
139 Universitat Pompeu Fabra, Barcelona; and CIBERONC, Spain.

140

141 **Correspondence to:** Núria Malats, Genetic and Molecular Epidemiology Group, Spanish  
142 National Cancer Research Center (CNIO), C/Melchor Fernandez Almagro 3, 28029-  
143 Madrid, Spain, Email: [nmalats@cnio.es](mailto:nmalats@cnio.es), Phone: +34 917328000; and Marc A. Martí-  
144 Renom, Structural Genomics Group, Centre Nacional d'Anàlisi Genòmica - Centre de  
145 Regulació Genòmica (CNAG-CRG), Baldiri Reixac 4, 08028-Barcelona,  
146 Email: [martirenom@cnag.crg.eu](mailto:martirenom@cnag.crg.eu), Phone: +34 9340 33743.

147

148 **Keywords:** pancreatic cancer risk, genome wide association analysis, genetic  
149 susceptibility, 3D genomic structure, Local Indices of Genome Spatial Autocorrelation

150

151 Word count - Abstract: **148**

152 Word count - Text: **4,119**

153 Word count Methods: **1,963**

154 Number of References: **75**

155 Number of Figures: **6**

156 Number of supplementary tables: **8**

157 Number of supplementary figures: **6**

158 **ABSTRACT**

159 Pancreatic cancer (PC) is a complex disease in which both non-genetic and genetic factors  
160 interplay. To-date, 40 GWAS hits have been associated with PC risk in individuals of  
161 European descent, explaining 4.1% of the phenotypic variance. Here, we complemented  
162 a classical new PC GWAS (1D) with spatial autocorrelation analysis (2D) and Hi-C maps  
163 (3D) to gain additional insight into the inherited basis of PC. *In-silico* functional analysis  
164 of public genomic information allowed prioritization of potentially relevant candidate  
165 variants. We replicated 17/40 previous PC-GWAS hits and identified novel variants with  
166 potential biological functions. The spatial autocorrelation approach prioritized low MAF  
167 variants not detected by GWAS. These were further expanded via 3D interactions to 54  
168 target regions with high functional relevance. This multi-step strategy, combined with an  
169 in-depth *in-silico* functional analysis, offers a comprehensive approach to advance the  
170 study of PC genetic susceptibility and could be applied to other diseases.

171

172 **INTRODUCTION**

173 Pancreatic cancer (PC) has a relatively low incidence but it is one of the deadliest tumors.  
174 In Western countries, PC ranks fourth among cancer-related deaths with 5-year survival  
175 of 3% in Europe<sup>1-3</sup>. In the last decades, progress in the management of patients with PC  
176 has been meagre. In addition, mortality is rising<sup>2</sup> and it is estimated that PC will become  
177 the second cause of cancer-related deaths in the United States by 2030<sup>4</sup>.

178 PC is a complex disease in which both genetic and non-genetic factors participate.  
179 However, relatively little is known about its etiologic and genetic susceptibility  
180 background. In comparison with other major cancers, fewer genome-wide association  
181 studies (GWAS) have been carried out and the number of patients included in them is  
182 relatively small (N=9,040). According to the GWAS Catalog, (January 2019)<sup>5</sup>, 40  
183 common germline variants associated with PC risk have been identified in 32 loci in  
184 individuals of European descent<sup>6-11</sup>. However, these variants only explain 4.1% of the  
185 phenotypic variance for PC<sup>12</sup>. More importantly, given the challenges in performing new  
186 PC case-control studies with adequate clinical, epidemiological, and genetic information,  
187 the field is far from reaching the statistical power that has been achieved in other more  
188 common cancers such as breast, colorectal, or prostate cancers with >100,000 subjects  
189 included in GWAS, yielding a much larger number of genetic variants associated with  
190 them<sup>5</sup>.

191 Current GWAS methodology relies on setting a strict statistical threshold of  
192 significance ( $p$ -value= $5 \times 10^{-8}$ ) and on replication in independent studies. This approach  
193 has been successful in minimizing false positive hits at the expense of discarding variants  
194 that may be truly associated with the disease (false negatives) displaying association  $p$ -  
195 values not reaching genome-wide significance after multiple testing correction or not  
196 being replicated in independent populations. The "simple" solution to this problem is to  
197 increase the number of subjects. However, it will take considerable time for PC GWAS

198 studies to reach the sample size achieved in other tumors and the funding climate for  
199 replication studies is extremely weak. While a meta-analysis based on available datasets  
200 provides an alternative strategy for novel variant identification, this approach may  
201 introduce heterogeneity because studies differ regarding methods, data quality, testing  
202 strategies, genetic background of the included individuals (e.g., population substructure),  
203 and study design, factors that can lead to lack of replicability. Therefore, we are faced  
204 with the need of exploring alternative approaches to substantiate findings of putative  
205 genetic risk variants not fulfilling conventional GWAS criteria.

206         Here, we build upon one of the largest epidemiological PC case-control studies  
207 with extensive standardized clinical and epidemiological annotation and expand the  
208 findings of a classical GWAS to include novel strategies for risk-variant discovery. First,  
209 we used the Local Moran's Index (LMI)<sup>13</sup>, an approach that is widely applied in  
210 geospatial statistics. In its original application to geographic two-dimensional analysis,  
211 LMI identifies the existence of relevant clusters in the spatial arrangement of a variable,  
212 highlighting points closely surrounded by others with similar values, allowing the  
213 identification of "hot spots". In our genomic application, we computed local indexes of  
214 spatial (genomic) autocorrelation to identify clusters of SNPs based on their similar  
215 magnitudes of association (odds ratio, OR) weighted by their genomic distance as  
216 measured by linkage disequilibrium (LD). By capturing LD structures of nearby SNPs,  
217 LMI leverages the values of SNPs with low minor allele frequencies (MAF) that  
218 conventional GWAS fail to assess properly. In this regard, LMI offers a novel opportunity  
219 to identify potentially relevant new set of genomic candidates associated with PC genetic  
220 susceptibility.

221         In addition, we have taken advantage of recent advances in 3D genomic analyses  
222 providing insights into the spatial relationship of regulatory elements and their target  
223 genes. Since GWAS have largely identified variants present in non-coding regions of the



224 genome, a challenge has been to ascribe such variants to the corresponding regulated  
225 genes, which may lie far away in the genomic sequence. Chromosome Conformation  
226 Capture experiments (3C-related techniques)<sup>14</sup> can provide insight into the biology and  
227 function underlying previously “unexplained” hits<sup>15,16</sup>.

228 High-throughput technologies have produced large amounts of publicly-available  
229 data from cell types and tissues. Given the hypothesis-free nature of GWAS, the  
230 aforementioned resources represent a valuable approach to validate prioritized variants  
231 using novel criteria, as well as for functional interpretation of genetic findings.

232 The combined use of conventional GWAS (1D) analysis with LMI (2D) and 3D  
233 genomic approaches has allowed enhancing the discovery of novel candidate variants  
234 involved in PC (**Figure 1**). Importantly, several of the new variants are located in genes  
235 relevant to the biology and function of pancreatic epithelial cells.

236

## 237 **RESULTS**

### 238 ***1D Approach: PanGenEU GWAS - Single marker association analyses***

239 We performed a GWAS including data from 1,317 patients diagnosed with PC (cases)  
240 and 1,616 control individuals from European countries. In addition to all genotyped SNPs  
241 that passed the QC procedure, we included imputed data for the previously reported PC-  
242 associated hits not genotyped in OncoArray-500K; the 1000G Phase3 (Haplotype release  
243 date October 2014) being used as reference<sup>17</sup>. In all, 317,270 SNPs were tested (**Figure**  
244 **S1**) with little evidence of genomic inflation (**Figure S2**).

245

246 **Replication of previously reported GWAS hits.** Of the 40 previously GWAS-  
247 discovered variants associated with PC risk in European ancestry populations<sup>5</sup>, 17  
248 (42.5%) were replicated with nominal  $p$ -values $<0.05$ . For all 17, the associations were in  
249 the same direction as in the primary reports (**Table S1**). Among them, we replicated

250 *NR5A2*-rs2816938 and *NR5A2*-rs3790844. Furthermore, we observed significant  
251 associations for seven additional variants tagging *NR5A2* previously reported in the  
252 literature<sup>7-10,18</sup>. At the GWAS significance level, we also replicated the GWAS hits  
253 *LINC00673*-rs7214041<sup>11</sup> and *TERT*-rs2736098<sup>8,11</sup>.

254

255 **Validation of the top 20 PanGenEU GWAS hits in independent populations.** The risk  
256 estimates of the top 20 variants in the PanGenEU GWAS were included in the meta-  
257 analysis with those derived from PanScanI+II, PanScan III, and PanC4 consortia GWAS,  
258 representing a total of 10,357 cases and 14,112 controls (**Table S2**). PanGenEU GWAS  
259 identified a new variant in *NR5A2* associated with PC (*NR5A2*-rs3790840, metaOR=1.23,  
260  $p$ -value= $5.91 \times 10^{-6}$ ) which is in moderate LD with *NR5A2*-rs4465241 ( $r^2=0.45$ ,  
261 metaOR=0.81,  $p$ -value= $3.27 \times 10^{-10}$ ) and had previously been reported in a GWAS  
262 pathway analysis<sup>18</sup>. *NR5A2*-rs3790840 remained significant ( $p$ -value $<0.05$ ) when  
263 conditioned on *NR5A2*-rs4465241, on *NR5A2*-rs3790844 plus *NR5A2*-rs2816938, and  
264 even on the 13 *NR5A2* GWAS hits reported in the literature, indicating that *NR5A2*-  
265 rs3790840 is a new, distinct, PC risk signal. Using SKAT-O (seqMeta R package), we  
266 performed a gene-based association analysis considering all significant *NR5A2* hits plus  
267 *NR5A2*-rs3790840; the *NR5A2*-based association results were significant ( $p$ -  
268 value= $8.9 \times 10^{-4}$ ). Furthermore, in a case-only analysis conducted within the PanGenEU  
269 study, *NR5A2* variation was also associated with diabetes ( $p$ -value= $6.0 \times 10^{-3}$ ), suggesting  
270 an interaction between both factors in relation to PC risk.

271

272 **Post-GWAS Functional in-silico analyses.**

273 **Assessment of potential functionality of the variants.** We expanded the primary  
274 assessment by performing a systematic *in silico* functional analysis of SNPs with GWAS  
275  $p$ -values $<1 \times 10^{-4}$  (N=143) at the variant, gene, and pathway levels (**Figure S3**). The

276 potential functionality of the most relevant SNPs, according to the features considered at  
277 all levels, is summarized in **Supplementary Material and Table S3**.

278 Among the functionally suggestive variants, we highlight those in *CASC8*  
279 (8q24.21) (**Figure 2**): 27 variants with  $p$ -values  $<1 \times 10^{-4}$  organized in four LD-blocks  
280 were identified. The largest block contained 11 variants ( $r^2=0.87-1$ ). For 8 of them, the  
281 ORs of the association alleles were below unity. *CASC8* codes for a non-protein coding  
282 RNA overexpressed in tumor vs normal pancreatic tissue (Log2FC=1.25,  $p$ -  
283 value= $2.29 \times 10^{-56}$ ). All *CASC8* variants were associated with differential leukocyte  
284 methylation (mQTL) of *RP11-382A18.1-cg25220992* in our PanGenEU population  
285 sample. Moreover, 20 of them were also associated with differential methylation of  
286 cg03314633, also in *RP11-382A18.1*. Twenty-three of the variants overlapped with at  
287 least one histone mark in either endocrine or exocrine pancreatic tissue. Two of these hits  
288 have been previously associated with other cancers: *CASC8*-rs1562430 (breast,  
289 colorectal, and stomach) and *CASC8*-rs2392780 (breast). None of the *CASC8* hits were  
290 in LD with *CASC11*-rs180204, a GWAS hit previously associated with PC risk, which is  
291 ~205 Kb downstream<sup>10</sup>. *CASC8* also overlaps with a PC-associated lncRNA<sup>19</sup>, suggesting  
292 that genetic variants in *CASC8* may contribute to the transcriptional program of pancreatic  
293 tumor cells. Moreover, 5% of PC tumors catalogued in cBioPortal had alterations in  
294 *CASC8* (37 cases showed gene amplifications and one sample presented a fusion).  
295 Alterations in *CASC8* significantly co-occur with alterations in *TG* (adjusted  $p$ -  
296 values  $<0.001$ ), also associated with PC in our GWAS, which is located downstream.

297 Three of the variants prioritized for *in-silico* analysis are located in genes involved  
298 in pancreatic function: rs1220684 is in *SEC63*, coding for a protein involved in  
299 endoplasmic reticulum function and ER stress response<sup>20</sup>; rs7212943, a putative  
300 regulatory variant, is in *NOC2/RPH3AL*, a gene involved in exocytosis in exocrine and  
301 endocrine cells<sup>21</sup>; and rs4383344 is in *SCTR*, which encodes for the secretin receptor,

302 selectively expressed in the exocrine pancreas and involved in production and indirectly  
303 in regulation of bicarbonate, electrolyte, and volume secretion in ductal cells.  
304 Interestingly, secretin regulation is affected by *H. pylori* which has been suggested a PC  
305 risk factor<sup>22</sup>. High expression of *SCTR* has also been reported in PC<sup>23</sup>.

306 **Gene set enrichment analyses.** When considering the 81 genes harboring the 143 SNPs  
307 prioritized as described above, 6 chromosomal regions were significantly enriched  
308 (**Table S4**). Moreover, a gene-set enrichment analysis was performed for the gene-trait  
309 associations reported in the GWAS Catalog resulting in 29 traits (**Table S4**). The most  
310 relevant GWAS traits with significant enrichment were ‘Pancreatic cancer’, ‘Uric acid  
311 levels’, ‘Major depressive disorder’ and ‘Obesity-related traits’, in addition to ‘Lung  
312 adenocarcinoma’, ‘Lung cancer’, and ‘Prostate cancer’ traits. We also performed a  
313 network analysis using the *igraph* R package<sup>24</sup> to visualize the relationships between the  
314 enriched GWAS traits and the prioritized genes. Twelve densely connected subgraphs  
315 were identified via random walks (**Figure 3**). Interestingly, ‘pancreatic cancer’ and ‘uric  
316 acid levels’ GWAS traits were connected through *NR5A2*, which is also linked to ‘chronic  
317 inflammatory diseases’ and ‘lung carcinoma’ traits. *NR5A2* is an important regulator of  
318 pancreatic differentiation and inflammation in the pancreas<sup>25</sup>.

319 **Pathway enrichment analyses.** A total of 112 Gene Ontology (GO) terms according to  
320 their biological function (GO:BP) (adjusted  $p$ -values < 0.05, with minimum of three genes  
321 overlapping), seven GO terms according to their cellular components (GO:CC) and 11  
322 terms according to their molecular functions (GO:MF) were significantly enriched with  
323 the prioritized genes (**Table S4**). Interestingly, GO terms relevant to exocrine pancreatic  
324 function were overrepresented. Three KEGG pathways were significantly enriched  
325 with  $\geq 2$  genes from our prioritized set (**Table S4**); among them are: “Glycosaminoglycan  
326 biosynthesis heparan sulfate” ( $adj-p=3.86 \times 10^{-3}$ ), “ERBB signaling pathway” ( $adj-$   
327  $p=3.73 \times 10^{-2}$ ) and “Melanogenesis” ( $adj-p=3.73 \times 10^{-2}$ ). Interconnections between the

328 three significant KEGG pathways after gene enrichment were explored using the  
329 *Pathway-connector* webtool (**Figure S4**), which also found six complementary pathways:  
330 ‘Tyrosine metabolism’, ‘Metabolic pathways’, ‘Glycolysis/Gluconeogenesis’,  
331 ‘Glycerolipid metabolism’, ‘PI3K-Akt signaling pathway’, ‘mTOR signaling pathway’.

332

### 333 ***2D-Approach: Integration of geospatial features.***

334 **Variant prioritization using LMI.** We scaled up from the single-SNP (1D) to the  
335 genomic region (2D) association analysis by considering both genomic distance (LD)  
336 between variants and association magnitude (OR). We calculated a LMI score (see  
337 Methods) for 98.8% of the SNPs in our dataset, as 1.2% of the SNPs were not genotyped  
338 in the 1000 G (Phase 3, v1) reference data set<sup>17</sup> or had a MAF<1% in the CEU European  
339 population (n=85 individuals, phase 1, version 3). We selected those SNPs with positive  
340 LMI or within the top 50% of OR values. This filter resulted in a final set of 102,146  
341 SNPs. The LMI scores and *p*-values for these variants showed a direct correlation  
342 (Spearman  $r=0.62$ ;  $p\text{-value}=2.2\times 10^{-16}$ , **Figure 4**). Next, an LMI-enriched variant set was  
343 generated by selecting the top 0.5% of SNPs according to their LMI scores, which  
344 included 29 out of the 143 SNPs selected through their GWAS *p*-values. Finally, a  
345 combined SNP set was generated by adding the remaining 114 SNPs prioritized in the 1D  
346 approach to the LMI-enriched dataset, resulting in 624 SNPs (**Figure 4**). To assess the  
347 versatility of LMI, we ran two benchmarks on the MAFs and the ORs, both confirming  
348 the potential to prioritize SNPs (**Supplementary Material**). We compared the MAF  
349 distribution between the GWAS-prioritized and the LMI-selected SNPs. Notably, LMI-  
350 SNPs were mainly variants with low MAF (<0.1). (**Figure S5**). After excluding correlated  
351 SNPs among the 143 GWAS-SNPs and the 624 LMI-SNPs by LD ( $r^2 < 0.2$  to consider  
352 independent loci; Methods), we obtained 97 and 248 independent signals, respectively.  
353 Average MAF for the GWAS-prioritized variants was 0.24 (SD=0.13), compared with

354 0.07 (SD=0.03) for the top-rank LMI-SNPs. This result emphasizes that statistical  
355 significance for GWAS-SNPs is largely dependent on MAF and the statistical power of  
356 the study, highlighting this as a major limitation of classical GWAS analyses. LMI  
357 captured a new dimension of signals independent from MAF (**Figure S5**). In line with  
358 the above observation, the average OR for the LMI-SNPs was significantly higher than  
359 that for the GWAS-SNPs (1.46 vs. 1.32, respectively, Wilcoxon statistic  $p$ -  
360 value= $1.63 \times 10^{-10}$ ). Altogether, these results support the notion that LMI is more sensitive  
361 to detect candidate SNPs with lower MAFs but relevant effect sizes.

362 **Biological annotation of LMI-regions.** Variants prioritized according to both LMI and  
363 GWAS  $p$ -value (N=624) were annotated to 338 genes using annotatePeaks.pl HOMER  
364 script<sup>26</sup> (**Table S5**). The two top LMI-SNPs were also captured by the GWAS approach.  
365 They map, respectively, to intronic sequences of *MINDY1* ( $p$ -value=  $1.26 \times 10^{-6}$ ) and  
366 *SETDB1* ( $p$ -value= $4.94 \times 10^{-6}$ ). Importantly, among the top SNPs identified by LMI was  
367 *BCARI*-rs7190458, a variant with a relevant role in PC<sup>27</sup> reported in two previous  
368 GWAS<sup>8,11</sup>. An additional SNP (rs13337397) in the first exon of *BCARI*, and in low LD  
369 with *BCARI*-rs7190458 ( $r^2=0.36$ ), was also prioritized by LMI. This SNP is intergenic to  
370 *CTRB1-2* and *BCARI* (**Figure 5**). While *BCARI* is ubiquitous, *CTRB1-2* is expressed  
371 exclusively in the exocrine pancreas and genetic variation therein has been previously  
372 associated with alcoholic pancreatitis<sup>28</sup> and type-2 diabetes<sup>29,30</sup>. The expression of both  
373 genes is reduced in tumors vs. normal tissue<sup>31</sup>.

374 We also found 11 SNPs associated with *CDKN2A*, a gene that is almost  
375 universally inactivated in PC<sup>32</sup> and that is mutated in some hereditary forms of PC<sup>33,34</sup>.  
376 Other SNPs identified by LMI were *DVL*-rs73185718 and *PRKCA*-rs11654719, that were  
377 also prioritized by GWAS, and two SNPs tagging *ROR2* (rs12002851 and rs2002478), a  
378 member of the *Wnt* pathway that plays a relevant role in PC<sup>35</sup>. *KDM4C*-rs72699638, a  
379 Lys demethylase 4C highly expressed in PC<sup>36</sup> was also prioritized by LMI. Interestingly,

380 the LMI analysis identified a hotspot region of 61 SNPs located upstream of *XBPI* (chr.  
381 22, 28.3-29.3 Mb), a highly expressed gene in the healthy pancreas. The transcription  
382 factor XBP1 is involved in ER stress and the unfolded protein response - a highly relevant  
383 process in acinar homeostasis due to the high protein-producing capacity of these cells -  
384 and it plays an important role in pancreatic regeneration<sup>37</sup>.

385 **Functionality of LMI-variants.** We used CADD (Combined Annotation Dependent  
386 Depletion<sup>38</sup> values to score the deleteriousness of LMI SNPs. LMI variant prioritization  
387 detected three variants in coding transcripts which showed the top CADD values and were  
388 not prioritized using the GWAS approach: *GPRC6A*-rs6907580 in chr6:117,150,008,  
389 CADD-score=5.0, LMI=8.93, GWAS  $p$ -value= $4 \times 10^{-3}$ ; *MS4A5*-rs34169848 in  
390 chr11:60,197,299, CADD-score=24.4, LMI=7.09, GWAS  $p$ -value= $1 \times 10^{-2}$ ; and *LRRC36*-  
391 rs8052655 in chr16:67,409,180, CADD-score=24.4, LMI=5.75, GWAS  $p$ -value= $2 \times 10^{-2}$ .  
392 *GPRC6A*-rs6907580 is a well-characterized stop-gain variant in exon 1 of *GPRC6A* (*G*  
393 *protein-coupled receptor family C group 6 member A*). *GPRC6A* is expressed in  
394 pancreatic  $\beta$ -cells and participates in endocrine metabolism<sup>39</sup> and this SNP is linked to a  
395 non-functional variant of *GPRC6A* receptor protein<sup>40</sup>. Furthermore, LMI identified  
396 rs17078438 (6q22.1) in *RFX6*, a pancreas-specific gene involved in endocrine  
397 development<sup>41</sup> (**Figure 5**).

398

### 399 **3D-Approach: genomic interaction analysis.**

400 To gain further insight into the putative biological functions of the 624 candidate  
401 SNPs selected through GWAS-LMI, we focused on a set of 6,761 significant chromatin  
402 interactions ( $p$ -values  $\leq 1 \times 10^{-5}$ ) (see Methods) identified using Hi-C interaction pancreatic  
403 tissue maps at 40Kb resolution<sup>42</sup>. Throughout the rest of the text, we will refer to the  
404 chromatin interaction component containing the prioritized SNP as “bait” and to its  
405 interacting region as “target”. In total, 54 target regions overlapping with 37 genes



406 interacted with bait regions harboring 76/624 (12.1%) SNPs (**Table S6**). Among them,  
407 we highlight again *XBPI* as we discovered that an intronic region of *TTC28* (bait:  
408 22:28,602,352-28,642,352bp) including four LMI-selected SNPs (rs9620778, rs9625437,  
409 rs17487463 and rs75453968, all in high LD,  $r^2 > 0.95$ , in CEU population) significantly  
410 interacted with the *XBPI* promoter (target: 22:29,197,371-29,237,371bp,  $p$ -  
411 value= $1.3 \times 10^{-9}$ ) (**Figure 6**). To confirm that this target region is relevant for pancreatic  
412 carcinogenesis, we retrieved from ENCODE the Chip-Seq data of all available non-tumor  
413 pancreatic samples (n=4 individuals) as well as from PANC-1 pancreas cancer cells (see  
414 Methods). We found that the H3K27Ac mark present in the *XBPI* promoter is completely  
415 lost in PANC-1 cells and is reduced in a sample of a Pancreatic Intraepithelial Neoplasia  
416 1B, a PC precursor in comparison to normal pancreas (**Figure 6**). To characterize the bait  
417 and promoter regions upstream of *XBPI* further, we ran eight chromatin states using  
418 ChromHMM (**Supplementary Methods**). We observed a clear loss of enhancers/weak  
419 promoters in the corresponding target regions in the precursor lesions and in PANC-1  
420 cells. This loss of activity is in line with the observation that *XBPI* expression is reduced  
421 in cancer. Moreover, small enhancers are also lost in the bait region of the aforementioned  
422 samples. We also checked whether the 3D maps for this region were comparable in  
423 healthy pancreas and PANC-1 cells and found that there was no significant contact in  
424 PANC-1 cells (**Figure 6**). Overall, these analyses indicate that the SNPs interacting in 3D  
425 space with the *XBPI* promoter could contribute to the differential expression of the gene  
426 associated with malignant transformation. These findings provide proof of concept that  
427 the LMI analysis combined with 3D genomics can contribute to decipher the biological  
428 relevance of orphan SNPs.

429 To explore the translatable potential of the loci identified, we searched for all  
430 genes detected through GWAS-LMI and 3D genomic interactions in the PharmaGKB  
431 database (**Supplementary Material**). While we did not find direct evidence of these



432 genes as targets for current PC treatments, 23/338 (6.8%) of the genes were annotated in  
433 the list of clinically actionable gene-drug associations for other cancer types or conditions  
434 associated with PC.

435

## 436 **DISCUSSION**

437 In this work, we have expanded the scope of genomic analysis of the susceptibility to PC  
438 from the standard GWAS strategy to include novel approaches building on spatial  
439 autocorrelations of LMI and the 3D chromatin. An in-depth *in-silico* functional analysis  
440 leveraging available genomic information from public databases allowed us to prioritize  
441 novel candidate variants with strong biological plausibility. We have thus reached a novel  
442 landscape on the inherited basis of PC and have paved the way to the application of a  
443 similar strategy to any other human disease or interest.

444 This is the first PC GWAS involving an exclusively Europe-based population  
445 sample. Of the previously reported European ancestry population GWAS hits, 42.5%  
446 were replicated, supporting the methodological soundness of the study. The lack of  
447 replication of other PC GWAS hits may be explained by variation in the MAFs of the  
448 SNPs among Europeans, population heterogeneity, differences in the genotyping  
449 platform used, and differences in calling methods applied, among others. Replicated  
450 GWAS hits included *LINC00673*-rs7214041 reported to be in complete LD with  
451 *LINC00673*-rs11655237<sup>11</sup>, previously shown to be a PC-associated variant<sup>9</sup> and  
452 replicated in our GWAS. *LINC00673* lies in a genomic region that is recurrently amplified  
453 and overexpressed in PC and is associated with poor clinical outcome<sup>19</sup>. Experimental  
454 evidence supports a functional role of *LINC00673* in the regulation of PC differentiation  
455 and in epithelial-mesenchymal transition<sup>19</sup>. Independent studies have confirmed the  
456 relevance of *LINC00673* in tumors and *in vitro*<sup>43</sup>. Beyond replicating previous GWAS

457 hits, our study identified a novel variant in *NR5A2* (rs3790840) that independently  
458 associated with PC risk, strengthening the relevance of this gene in PC susceptibility.

459 We have also explored the potential of novel post-GWAS approaches to uncover  
460 variants failing to reach the strict GWAS *p*-value significance threshold. We applied the  
461 LMI for the first time in the genomics field (Anselin 1995). We replicated 6.4% of the  
462 previous reported GWAS Catalog signals for PC in European populations by considering  
463 the top 0.5% LMI variants, a LMI threshold that is overly conservative, given that many  
464 of the GWAS Catalog-replicated signals have lower LMI than the cut-off value we  
465 selected (see Methods). The ability of LMI to prioritize low MAF SNPs, unlike the  
466 GWAS approach, may also explain the low replicability rate. Despite the latter, LMI helps  
467 to identify correct signals within genomic regions, by scoring lower those regions that do  
468 not maintain LD structure (**Figure S5**).

469 To shed light into the functionality of the newly identified variants, we  
470 interrogated several databases at the SNP, gene, and pathway levels. We found sound  
471 evidence pointing to the functional relevance of several of the 143 GWAS *p*-value  
472 prioritized SNPs in the pancreas (**Table S3, Supplemental Material**). The importance of  
473 the multi-hit *CASC8* region (8q24.21) is supported by post-GWAS *in-silico* functional  
474 analyses as well as by its previously associations with PC at the gene level<sup>19</sup>. In particular,  
475 12/27 SNPs identified in *CASC8* were annotated as regulatory. Among them, *CASC8*-  
476 rs283705 and *CASC8*-rs2837237 ( $r^2=0.68$ ) are likely to be functional with a score of 2b  
477 in RegulomeDB (TF binding + any motif + DNase Footprint + DNase peak). Another  
478 variant (*CASC8*-rs1562430) was previously associated with risk of breast carcinoma<sup>44</sup>  
479 and is in high LD ( $r^2>0.85$ ) with 18 *CASC8* prioritized variants. None of the prostate  
480 cancer-associated SNPs in *CASC8* overlapped with the 27 identified variants in our study.  
481 The fact that this gene has not been reported previously in other PC GWAS could be due

482 to the different genetic background of the study populations or to an overrepresentation  
483 of the variants tagging *CASC8* in the Oncoarray platform used here.

484 In addition to confirming SNPs in *TERT*, we found strong evidence for the  
485 participation of novel susceptibility genes in telomere biology (*PARN*) and in the post-  
486 transcriptional regulation of gene expression (*PRKCA* and *EIF2B5*). Our study also  
487 expands the landscape of variants and genes involved in exocrine biology, including  
488 *SEC63*, *NOC2/RPH3AL* and *SCRT* whose function is likely to participate in acinar  
489 function and in acinar-ductal metaplasia, a PC pre-neoplastic lesion<sup>45</sup>.

490 The results from LMI and 3D genomic interactions further reinforce the role of  
491 genetic variation in these pathways. Among the SNP-LMI variants, *in-silico* functional  
492 assessment found evidence for a role of *GPRC6A*-rs6907580, *MS4A5*-rs34169848,  
493 *LRRC36*-rs8052655, *RFX6*-rs17078438, and *KDM4C*-rs72699638. The 3D genomic  
494 interaction approach also converged in *XBPI*, a critical regulator of acinar homeostasis.  
495 *XBPI* is a potential candidate detected through a previously uncharacterized “bait” SNP.  
496 These findings are particularly important considering that genetic mouse models have  
497 unequivocally shown that pancreatic ductal adenocarcinoma, the most common form of  
498 PC, can be initiated from acinar cells<sup>46</sup>. Similar results were found with other LMI  
499 selected SNPs associated with their target genes only by detecting significant spatial  
500 interactions between them (**Table S6**).

501 KEGG pathway enrichment analysis also validated other important pathways for  
502 PC, including “Glycosaminoglycan biosynthesis heparan sulfate” and “ERBB signaling  
503 pathway”. Heparan sulfate (HS) is formed by unbranched chains of disaccharide repeats  
504 which play roles in cancer initiation and progression<sup>47</sup>. Interestingly, the expression of  
505 HS proteoglycans increases in PC<sup>48</sup> and related molecules, such as hyaluronic acid, are  
506 important therapeutic targets in PC<sup>49,50</sup>. ERBB signaling is important both in PC initiation  
507 and as a therapeutic target<sup>51</sup>.

508           The enrichment analysis indicates that urate levels, depression, and body mass  
509 index - three GWAS traits previously reported to be associated with PC risk - were  
510 enriched in our prioritized gene set. Urate levels have been associated with both PC risk  
511 and prognosis<sup>52,53</sup>. In addition, patients with lower relative levels of kynurenic acid have  
512 more depression symptoms<sup>54</sup>. PC is one of the cancers with the highest occurrence of  
513 depression preceding its diagnosis<sup>55</sup>. Furthermore, body mass index has been previously  
514 associated with PC risk in diverse populations<sup>56-58</sup> and it has been suggested that  
515 increasing PC incidence may be partially attributed to the obesity epidemic. Insulin  
516 resistance is one of the mechanisms possibly underlying the obesity and PC association,  
517 through hyperinsulinemia and inflammation<sup>59</sup>.

518           Our post-GWAS approach has limitations that should be addressed in future  
519 studies. For example, our study has a relatively small sample size, some imbalances  
520 regarding gender and geographical areas, and the Hi-C maps that we used have limited  
521 resolution (40 kb). To account for population imbalances, regression models were  
522 adjusted for gender and for country of origin, as well as for first five principal  
523 components. In turn, our study has many strengths: a standardized methodology was  
524 applied in all participating centers to recruit cases and controls, to collect information,  
525 and to obtain and process biosamples; state-of-the-art methodology was used to extend  
526 the identification of variants, genes, and pathways involved in PC genetic susceptibility.  
527 Most importantly, the combination of GWAS, LMI and 3D genomics to identify new  
528 variants has not been applied in the past and has proven crucial to refine results, reduce  
529 the number of false positives, and establish whether borderline GWAS *p*-value signals  
530 could be true positives. These three strategies, together with an in-depth *in-silico*  
531 functional analysis, offer a comprehensive approach to advance the study of PC genetic  
532 susceptibility.

533 **METHODS**

534 **1D Approach: PanGenEU GWAS - *Single marker association analyses***

535 **Study population.** We used the resources from the PanGenEU case-control study  
536 conducted in Spain, Italy, Sweden, Germany, United Kingdom, and Ireland, between  
537 2009-2014<sup>60,61</sup>. Eligible PC patients, men and women  $\geq 18$  years of age, were invited to  
538 participate. Eligible controls were hospital in-patients with primary diagnoses not  
539 associated with known risk factors of PC. Controls from Ireland and Sweden were  
540 population-based. Institutional review board approval and written informed consent was  
541 obtained from all participating centers and study participants, respectively. To increase  
542 statistical power, we included controls from the Spanish Bladder Cancer  
543 (SBC)/EPICURO study, carried out in the same geographical areas where PanGenEU  
544 Study was conducted. Characteristics of the study populations are detailed in [Table S7](#).

545

546 **Genotyping and quality control in the PanGenEU study.** DNA samples were  
547 genotyped using the Infinium OncoArray-500K at the CEGEN facility (Spanish National  
548 Cancer Research Centre, CNIO). Genotypes were called using GenTrain 2.0 cluster  
549 algorithm in GenomeStudio software v.2011.1.0.24550 (Illumina, San Diego, CA).  
550 Genotyping quality control criteria considered the missing call rate, unexpected  
551 heterozygosity, discordance between reported and genotyped gender, unexpected  
552 relatedness, and estimated European ancestry  $< 80\%$ . After removing samples that did not  
553 pass the quality control filters, duplicated samples, and individuals with incomplete data  
554 regarding age of diagnosis/recruitment, 1,317 cases and 700 controls were available for  
555 the association analyses. SNPs in sex chromosomes and those that did not pass the Hardy-  
556 Weinberg equilibrium ( $p$ -value  $< 10^{-6}$ ) were also discarded. Overall, 451,883 SNPs passed  
557 the quality control filters conducted before the imputation.

558

559 **Genotyping and quality control of SBC/EPICURO controls.** Genotyping of germline  
560 DNA was performed using the Illumina 1M Infinium array at the NCI Core Genotyping  
561 Facility as previously described<sup>62</sup>, which provided calls for 1,072,820 SNP genotypes.  
562 We excluded SNPs in sex chromosomes, those with a low genotyping rate (<95%), and  
563 those that did not pass the Hardy-Weinberg equilibrium threshold. In addition, the exome  
564 of 36 controls was sequenced with the TruSeq DNA Exome and a standard quality control  
565 procedure both at the SNP and individual level was applied: SNPs with read depth <10  
566 and those that did not pass the tests of base sequencing quality, strand bias or tail distance  
567 bias, were considered as missing and imputed (see *Imputation* section for further details).  
568 Overall, 1,122,335 SNPs were available for imputation. In total, 916 additional controls  
569 were considered for this analysis.

570

571 **Imputation.** Imputation was performed at the Wellcome Sanger Institute, Cambridge,  
572 UK, and CNIO, Madrid, Spain, for the PanGenEU and the SBC/EPICURO studies,  
573 respectively. Imputation of missing genotypes was performed using IMPUTE v2<sup>63</sup> and  
574 genotypes of SBC/EPICURO controls were pre-phased to produce best-guess haplotypes  
575 using SHAPEIT v2 software<sup>64</sup>. For both PanGenEU and EPICURO studies, the 1000 G  
576 (Phase 3, v1) reference data set was used<sup>17</sup>.

577

578 **Association analyses.** A final set of 317,270 common SNPs (MAF>0.05) that passed  
579 quality control in both studies and showed comparable MAF across genotyping platforms  
580 was considered for analysis. We ensured the inclusion of the 40 variants previously  
581 associated with PC risk in individuals of Caucasian origin compiled in GWAS Catalog<sup>5</sup>.  
582 Logistic regression models were computed assuming an additive mode of inheritance for  
583 the SNPs, adjusted for age at PC diagnosis or at control recruitment, sex, the area of  
584 residence [Northern Europe (Germany and Sweden), European islands (UK and Ireland),

585 and Southern Europe (Italy and Spain)], and the first 5 principal components (PCs)  
586 calculated with *prcomp* R function based on the genotypes of 32,651 independent SNPs,  
587 (J Tyrer, personal communication) to control for potential population substructure.

588

589 **Validation of the novel GWAS hits.** To replicate the top 20 associations identified in  
590 the Discovery phase, we performed a meta-analysis using risk estimates obtained in  
591 previous GWAS studies from the Pancreatic Cancer Cohort Consortium (PanScan:  
592 <https://epi.grants.cancer.gov/PanScan/>) and the Pancreatic Cancer Case-Control  
593 Consortium (PanC4: <http://www.panc4.org/>), based on 16 cohort and 13 case-control  
594 studies. Details on individual studies, namely PanScan I, PanScan II, PanScan III and  
595 PanC4, have been described elsewhere<sup>6-9</sup>. Genotyping for PanScan studies was performed  
596 at the Cancer Genomic Research Laboratory (CGR) of the National Cancer Institute  
597 (NCI) using HumanHap550v3.0, and Human 610-Quad genotyping platforms for  
598 PanScan I and II, respectively, and the Illumina Omni series arrays for PanScan III.  
599 Genotyping for PanC4 was performed at the Johns Hopkins Center for Inherited Disease  
600 Research using the Illumina HumanOmniExpressExome-8v1 array. PanScan I/II datasets  
601 were imputed together using the 1000 G (Phase3, v1) reference data set<sup>17</sup> and IMPUTE2<sup>63</sup>  
602 and adjusting for study (PanScan I and II), geographical region (for PanScan III), age,  
603 sex, and PCA of population substructure (5 PC's for PanScan I+II, 6 for PanScan III) for  
604 PanScan models, and for study, age, sex and 7 PCA population substructure for PanC4  
605 models. Summary statistics from PanScanI/II, PanScan III and PanC4 were used for a  
606 meta-analysis using a random-effects model based on effect estimates and standard errors  
607 with the metafor R package<sup>65</sup>.

608

609 **Post-GWAS functional *in silico* analysis.** An exhaustive *in-silico* analysis was  
610 conducted for associations with  $p$ -values  $< 1 \times 10^{-4}$  in the PanGenEU GWAS (**Figure S3**).



611 Bioinformatics assessments included evidence of functional impact<sup>66,67</sup>, annotation in  
612 overlapping genes and pathways<sup>66</sup>, methylation quantitative trait locus in leukocyte DNA  
613 from a subset of the PanGenEU controls (mQTLs), expression QTL (eQTLs) in normal  
614 and tumoral pancreas (GTEx and TCGA, respectively)<sup>68,69</sup>, annotation in PC-associated  
615 long non-coding RNA (lncRNAs)<sup>19</sup>, protein quantitative trait locus analysis in plasma  
616 (pQTLs)<sup>70</sup>, overlap with regulatory chromatin marks in pancreatic tissue obtained from  
617 ENCODE<sup>71</sup>, association with relevant human diseases<sup>72</sup>, and annotation in differentially  
618 open chromatin regions (DORs) in human pancreatic cells<sup>41</sup>. We also investigated  
619 whether prioritized variants had been previously associated with PC comorbidities or  
620 other types of cancers<sup>5</sup>. Furthermore, we used HOMER to map SNPs to significant 3D  
621 chromatin interaction (CI) in healthy pancreas tissue<sup>26</sup>. Then, we annotated those SNPs  
622 in significant interaction regions with the chromatin states<sup>73</sup>.

623 In addition to the functional analyses at the variant level, we conducted  
624 enrichment analyses at the gene level using the FUMAGWAS web tool<sup>72</sup> and investigated  
625 whether our prioritized set of genes appeared altered at the tumor level in a collection of  
626 pancreatic tumor samples<sup>74</sup>. Methodological details of all bioinformatics analyses  
627 conducted are described in detail in Supplementary Material.

628

## 629 **2D Approach: Local Moran Index.**

630 ***Local Moran's Index calculation.*** The LMI was obtained for each SNP considered in the  
631 GWAS (n=317,270) using the summary statistics resulting from the association analyses  
632 as follows. First, the OR of each SNP was referred to its risk-increasing allele (*i.e.*, OR>1)  
633 and the distribution of ORs was transformed to the inverse of the normal distribution.  
634 Second, each SNP was matched by MAF with surrounding common SNPs (*i.e.*, SNPs  
635 with MAF>=1% in the 85 European individuals of the 1000G, Phase 1, version 3),  
636 considering a window of +/- 500kb to ensure that haplotypes were matched. Linkage



637 disequilibrium ( $r^2$ ) was used as a proxy for the distance between each SNP and each of  
638 its neighboring SNPs. Next, the LMI for  $i$ -th SNP was calculated as:

639 
$$LMI_i = z_i * \sum \frac{z_j * r_{i,j}^2}{\sum r_{i,j}^2},$$

640 where  $LMI_i$  is the LMI value for the  $i$ -th SNP;  $z_i$  is the OR value for the  $i$ -th SNP,  
641 obtained from the inverse of the normal distribution of ORs for all SNPs;  $z_j$  is the OR for  
642 the  $j$ -th SNP within the physical distance and MAF-matched defined bounds; and  $r_{i,j}^2$  is  
643 the LD value, measured by  $r^2$ , between the  $i$ -th SNP and the  $j$ -th SNP.

644 After LMI calculation for the full set of SNPs, we discarded the SNPs that: (1)  
645 had a negative LMI, meaning either that surrounding SNPs and target SNP have largely  
646 different ORs or that they are in linkage equilibrium and, therefore, do not pertain to the  
647 same cluster; or (2) had a positive LMI, i.e. target and surrounding SNPs have similar  
648 ORs, but the SNP came from the bottom 50% tail of the distribution of the ordered  
649 transformed OR distribution. This generated a total final set of 102,146 SNPs, out of  
650 which we selected the top 0.5%, at a threshold of LMI value = 5.1071 (n=510).

651 To assess the usefulness of the LMI score for SNP prioritization, we ran two tests  
652 using SNPs known to be associated with PC in European populations [GWAS Catalog,  
653 n=40<sup>5</sup>]. Before performing this benchmarking test, we corrected the 40 signals by LD  
654 using a custom made “greedy” algorithm. First, we calculated all pairwise LD values ( $r^2$ )  
655 for all the SNPs on the same chromosome. Then, we reviewed the list of SNPs ordered  
656 by ascending position chromosome-wise and considered as a cluster all the SNPs that had  
657  $r^2 > 0.2$  with the SNP under consideration. We considered this set of SNPs as a unique  
658 genomic signal, filtered out the SNPs assigned to the cluster from the ranked list, and then  
659 proceeded to the next SNP. This resulted in a total of 30 independent clusters of  $\geq 1$  SNPs.  
660 When more than one SNP was included within the same cluster, the SNP with the highest

661 LMI was selected. The same procedure was applied to identify the independent loci in  
662 the GWAS-selected SNPs (n=143) and the set of LMI-selected SNPs (n=624).

663 For the first benchmarking test, we first evaluated whether the GWAS Catalog  
664 PC-associated SNPs had a LMI value higher than expected. Then, we ranked the LMI  
665 value for the 102,146 LMI-selected SNPs from highest to lowest, assigning position  
666 number “1” to the SNP with the highest LMI (LMI=18.23) and position number  
667 “102,146” to the one with the lowest LMI (LMI=0.000001). Out of the 30 signals derived  
668 from the GWAS Catalog, 22 were present in our 102,146 selected set. The observed  
669 median rank position in this list for the 22 PC signals was 22,640. This average position  
670 was significantly higher than 10,000 randomly selected sets of the same size (one tail *p*-  
671 value=0.0013) (**Figure S6**). Loci annotated in the GWAS Catalog as associated with PC  
672 tend to score higher LMI than expected by chance. Finally, for the benchmark based on  
673 replication of loci, out of the 30 independent signals, 21 clusters of more than one SNP  
674 were considered as replicated signals and 9 SNPs that were found by only one study were  
675 not replicated.

676

677 ***Biological annotation and functional in-silico analysis.*** LMI-selected variants were  
678 annotated to genes using annotatePeaks.pl script in HOMER<sup>26</sup> and their functionality was  
679 predicted using CADD<sup>38</sup> online software.

680

681 ***3D Approach: Hi-C pancreas interaction maps and interaction selection.***

682 The 3D Hi-C interaction maps for both healthy pancreas tissue (Schmitt et al. 2016) and  
683 for a pancreatic cancer cell line (PANC-1) were generated using TADbit as previously  
684 described<sup>75</sup>. Briefly, Hi-C FASTQ files for 7 replicas of healthy pancreas tissue were  
685 downloaded from GEO repository (Accession number: GSE87112; Sequence Read  
686 Archive Run IDs: SRR4272011, SRR4272012, SRR4272013, SRR4272014,

687 SRR4272015, SRR4272016, SRR4272017) and for PANC-1 FASTQ, files were  
688 available from ENCODE (Accession number: ENCSR440CTR). For further analysis, all  
689 7 healthy samples were merged. Next, the FASTQ files were mapped against the human  
690 reference genome hg19, parsed and filtered with TADbit to get the final number of valid  
691 interacting read pairs. Total numbers of 99,074,082 and 287,201,883 valid interaction  
692 pairs were obtained for the healthy and PANC-1 datasets, respectively. Valid pairs were  
693 next binned at 40 kb resolution to obtain chromosome-wide interaction matrices. Next,  
694 the HOMER package<sup>26</sup> was used to detect significant interactions between two bins of  
695 40kb within a window of 4Mb using the `-center` and `--maxDist 2000000` parameters.  
696 Using HOMER's default parameters (significant interactions at  $p$ -value=0.001), the final  
697 number of nominally significant interactions was 41,833 for the healthy dataset and  
698 357,749 for the PANC-1 dataset. To further filter the interactions, we assessed the number  
699 of possible unique bin combinations within 2Mb of a bin (that is, 4,950 combinations of  
700 any two bins) and calculated those interactions that passed a Bonferroni corrected  
701 threshold  $p$ -value= $10^{-5}$ . The sub-selected set of interactions was reduced to 6,761 for the  
702 healthy sample (that is, 16.2% top interactions from those originally selected by HOMER  
703 default parameters). Next, we sub-sampled the top 16% interactions for PANC-1 list,  
704 resulting in 57,813 significant interactions.

## 705 REFERENCES

1. Carrato, A. et al. A Systematic Review of the Burden of Pancreatic Cancer in Europe: Real-World Impact on Survival, Quality of Life and Costs.” *J Gastrointest Cancer* **46**, 201-11 (2015).
2. Malvezzi, M. et al. European Cancer Mortality Predictions for the Year 2015: Does Lung Cancer Have the Highest Death Rate in EU Women?” *Ann Oncol* **26**, 779–86 (2015).
3. Torre, L. A., Siegel, R. L. Ward, E. M. & Jemal, A. Global Cancer Incidence and Mortality Rates and Trends - An Update. *Cancer Epidemiol Biomarkers Prev* **25**, 16-27 (2016).
4. Rahib, L. Et al. Projecting Cancer Incidence and Deaths to 2030: The Unexpected Burden of Thyroid, Liver, and Pancreas Cancers in the United States. *Cancer Res* **74**, 2913-21 (2014).
5. Buniello, A. et al. The NHGRI-EBI GWAS Catalog of Published Genome-Wide Association Studies, Targeted Arrays and Summary Statistics 2019. *Nucleic Acids Res* **47**, D1005–12 (2019).
6. Amundadottir, L. et al. Genome-Wide Association Study Identifies Variants in the ABO Locus Associated with Susceptibility to Pancreatic Cancer. *Nature Genet* **41**, 986–90 (2009).
7. Petersen, G. M. et al. A Genome-Wide Association Study Identifies Pancreatic Cancer Susceptibility Loci on Chromosomes 13q22.1, 1q32.1 and 5p15.33. *Nat Genet* **42**, 224–28 (2010).
8. Wolpin, B. M. et al. Genome-Wide Association Study Identifies Multiple Susceptibility Loci for Pancreatic Cancer. *Nat Genet* **46** 994–1000 (2014).
9. Childs, E. J. et al. Common Variation at 2p13.3, 3q29, 7p13 and 17q25.1 Associated with Susceptibility to Pancreatic Cancer. *Nature Genet* **47**, 911–16 (2015).

10. Zhang, M. et al. Three New Pancreatic Cancer Susceptibility Signals Identified on Chromosomes 1q32.1, 5p15.33 and 8q24.21. *Oncotarget* **7**, 66328–43 (2016).
11. Klein, A. P. et al. Genome-Wide Meta-Analysis Identifies Five New Susceptibility Loci for Pancreatic Cancer. *Nat Commun* **9**, 556 (2018).
12. Chen, F. et al. Analysis of Heritability and Genetic Architecture of Pancreatic Cancer: A PANC4 Study. *Cancer Epidemiol Biomarkers Prev* **28**, 1238–45 (2019).
13. Anselin, L. Local Indicators of Spatial Association—LISA. *Geograph Anal* **27**, 93–115 (1995).
14. Dekker, J., Rippe, K., Dekker, M., & Kleckner, N. Capturing Chromosome Conformation. *Science* **295**, 1306–11 (2002).
15. Claussnitzer, M. et al. FTO Obesity Variant Circuitry and Adipocyte Browning in Humans. *New Engl J Med* **373**, 895–907 (2015).
16. Montefiori, L. E. et al. A Promoter Interaction Map for Cardiovascular Disease Genetics. *ELife* **7**, e35788 (2018).
17. Altshuler, D. L. et al. A Map of Human Genome Variation from Population-Scale Sequencing. *Nature* **467**, 1061–73 (2010).
18. Li, D. et al. Pathway Analysis of Genome-Wide Association Study Data Highlights Pancreatic Development Genes as Susceptibility Factors for Pancreatic Cancer. *Carcinogenesis* **33**, 1384–90 (2012).
19. Arnes, L. et al. Comprehensive Characterisation of Compartment-Specific Long Non-Coding RNAs Associated with Pancreatic Ductal Adenocarcinoma. *Gut* **68**, 499–511 (2019).
20. Linxweiler, M, Schick, B. & Zimmermann, R. Let's Talk about Secs: Sec61, Sec62 and Sec63 in Signal Transduction, Oncology and Personalized Medicine. *Signal Transduct Target Ther* **2**:17002 (2017).

21. Matsumoto, M. et al. Noc2 Is Essential in Normal Regulation of Exocytosis in Endocrine and Exocrine Cells. *Proc Natl Acad Sciences USA* **101**, 8313–18 (2004).
22. Risch HA. Etiology of pancreatic cancer, with a hypothesis concerning the role of N-nitroso compounds and excess gastric acidity. *J Natl Cancer Inst* **95**, 948-60 (2003).
23. Körner, M. et al. Secretin Receptors in Normal and Diseased Human Pancreas: Marked Reduction of Receptor Binding in Ductal Neoplasia. *Am J Pathol* **167**, 959–68 (2005).
24. Pemberton, J. R. Retention of Mercurial Preservatives in Desiccated Biological Products. *J Clin Microbiol* **2**, 549–51 (1975).
25. Cobo, I. et al. Transcriptional Regulation by NR5A2 Links Differentiation and Inflammation in the Pancreas. *Nature* **554**, 533–37 (2018).
26. Heinz, S. et al. Simple Combinations of Lineage-Determining Transcription Factors Prime Cis-Regulatory Elements Required for Macrophage and B Cell Identities. *Mol Cell* **38**, 576–89 (2010).
27. Duan, B. et al. Genetic Variants in the Platelet-Derived Growth Factor Subunit B Gene Associated with Pancreatic Cancer Risk. *Int J Cancer* **142**, 1322–31 (2018).
28. Rosendahl, J. et al. Genome-Wide Association Study Identifies Inversion in the CTRB1-CTRB2 Locus to Modify Risk for Alcoholic and Non-Alcoholic Chronic Pancreatitis. *Gut* **67**, 1855–63 (2018).
29. Morris, A. P. et al. Large-Scale Association Analysis Provides Insights into the Genetic Architecture and Pathophysiology of Type 2 Diabetes. *Nat Genet* **44**, 981–90 (2012).
30. Xue, A. et al. Genome-Wide Association Analyses Identify 143 Risk Variants and Putative Regulatory Mechanisms for Type 2 Diabetes. *Nat Commun* **9** 2941 (2018).

31. Tang, Z. et al. GEPIA: A Web Server for Cancer and Normal Gene Expression Profiling and Interactive Analyses. *Nucleic Acids Res* **45**, W98–102 (2017).
32. Notta, F. et al. A Renewed Model of Pancreatic Cancer Evolution Based on Genomic Rearrangement Patterns. *Nature* **538**, 378–82 (2016).
33. Bartsch, D. K. et al. CDKN2A Germline Mutations in Familial Pancreatic Cancer. *Ann Surg* **236**, 730–37 (2002).
34. Lynch, H. T. et al. Phenotypic Variation in Eight Extended CDKN2A Germline Mutation Familial Atypical Multiple Mole Melanoma-Pancreatic Carcinoma-Prone Families: The Familial Atypical Multiple Mole Melanoma-Pancreatic Carcinoma Syndrome. *Cancer* **94**, 84–96 (2002).
35. Morris, J. P., Wang, S. C. & Hebrok, M. KRAS, Hedgehog, Wnt and the Twisted Developmental Biology of Pancreatic Ductal Adenocarcinoma. *Nat Rev Cancer* **10**, 693-95 (2010).
36. Gregory, B. L. & Cheung, V. G. Natural Variation in the Histone Demethylase, KDM4C, Influences Expression Levels of Specific Genes Including Those That Affect Cell Growth. *Genome Res* **24**, 52–63 (2014).
37. Hess, D. A. et al. Extensive Pancreas Regeneration Following Acinar-Specific Disruption of Xbp1 in Mice. *Gastroenterology* **141**, 1463–72 (2011).
38. Rentzsch, P., Witten, D., Cooper, G. M., Shendure, J. & Kircher, M. CADD: Predicting the Deleteriousness of Variants throughout the Human Genome. *Nucleic Acids Res* **47**, D886–94 (2019).
39. Pi, M. & Quarles, L. D. Multiligand Specificity and Wide Tissue Expression of GPRC6A Reveals New Endocrine Networks. *Endocrinology* (2012).
40. Jørgensen, S. et al. Genetic Variations in the Human g Protein-Coupled Receptor Class C, Group 6, Member A (GPRC6A) Control Cell Surface Expression and Function. *J Biol Chem* **292**, 1524–34 (2017).

41. Arda, H. et al. A Chromatin Basis for Cell Lineage and Disease Risk in the Human Pancreas. *Cell Syst* **7**, 310-322.e4 (2018).
42. Schmitt, A. D. et al. A Compendium of Chromatin Contact Maps Reveals Spatially Active Regions in the Human Genome. *Cell Rep* **17**, 2042–59 (2016).
43. Zhao, X. et al. Linc00511 Acts as a Competing Endogenous RNA to Regulate VEGFA Expression through Sponging Hsa-MiR-29b-3p in Pancreatic Ductal Adenocarcinoma. *J Cell Mol Med* **22**, 655–67 (2018).
44. Turnbull, C. et al. Genome-Wide Association Study Identifies Five New Breast Cancer Susceptibility Loci. *Nat Genet* **42**, 504-7 (2010).
45. Notta, F., Hahn, S.A. & Real, F.X. The genetic roadmap of pancreatic cancer: still evolving. *Gut* **66**, 2170-278 (2017).
46. Guerra, C. et al. Chronic Pancreatitis Is Essential for Induction of Pancreatic Ductal Adenocarcinoma by K-Ras Oncogenes in Adult Mice. *Cancer Cell* **11**, 291–302 (2007).
47. Nagarajan, A., Malvi, P. & Wajapeyee, N. Heparan Sulfate and Heparan Sulfate Proteoglycans in Cancer Initiation and Progression. *Front Endocrinol* **9**, 483 (2018).
48. Theocharis, A. D., Skandalis, S. S., Tzanakakis, G. N. & Karamanos, N. K. Proteoglycans in Health and Disease: Novel Roles for Proteoglycans in Malignancy and Their Pharmacological Targeting. *FEBS J* **277**, 3904-23 (2010).
49. Hingorani, S. R. et al. HALO 202: Randomized Phase II Study of PEGPH20 Plus Nab-Paclitaxel/Gemcitabine Versus Nab-Paclitaxel/Gemcitabine in Patients With Untreated, Metastatic Pancreatic Ductal Adenocarcinoma. *J Clin Oncol* **36**, 359–66 (2018).
50. Provenzano, P. P. et al. Enzymatic Targeting of the Stroma Ablates Physical Barriers to Treatment of Pancreatic Ductal Adenocarcinoma. *Cancer Cell* **21**, 418–29 (2012).



51. Mccleary-Wheeler, A. L., McWilliams, R. & Fernandez-Zapico, M. E. Aberrant Signaling Pathways in Pancreatic Cancer: A Two Compartment View. *Mol Carcinog* **51**, 25–39 (2012)
52. Mayers, J. R. et al. Elevation of Circulating Branched-Chain Amino Acids Is an Early Event in Human Pancreatic Adenocarcinoma Development. *Nat Med* **20**, 1193–98 (2014).
53. Stotz, M. et al. Evaluation of Uric Acid as a Prognostic Blood-Based Marker in a Large Cohort of Pancreatic Cancer Patients. *PLoS ONE* **9**, e104730 (2014).
54. Botwinick, I. C. et al. A Biological Basis for Depression in Pancreatic Cancer. *Hpb (Oxford)* **16**, 740–43 (2014).
55. Eguia, V., Gonda T. A. & Saif MW. Early Detection of Pancreatic Cancer. *JOP* **13**,131-4 (2012).
56. Carreras-Torres, R. et al. The Role of Obesity, Type 2 Diabetes, and Metabolic Factors in Pancreatic Cancer: A Mendelian Randomization Study.” *J Natl Cancer Inst* 109 (2017).
57. Koyanagi, Y. N. et al. Body-Mass Index and Pancreatic Cancer Incidence: A Pooled Analysis of Nine Population-Based Cohort Studies with More than 340,000 Japanese Subjects. *J Epidemiol* **28**, 245–52 (2018).
58. Lauby-Secretan, B. et al. Body Fatness and Cancer - Viewpoint of the IARC Working Group. *New Engl J Med* **375**, 794–98 (2016).
59. Park, J., Morley, T. S., Kim, M., Clegg, D. J. & Scherer, D. J. Obesity and Cancer - Mechanisms Underlying Tumour Progression and Recurrence. *Nat Rev Endocrinol* **10**, 455-65 (2014).
60. Gomez-Rubio, P. et al. Reduced risk of pancreatic cancer associated with asthma and nasal allergies. *Gut* **66**, 314-322 (2017).

61. Molina-Montes, E. et al. Risk of pancreatic cancer associated with family history of cancer and other medical conditions by accounting for smoking among relatives. *Int J Epidemiol* **47**, 473–483 (2018).
62. Rothman, N. et al. A Multi-Stage Genome-Wide Association Study of Bladder Cancer Identifies Multiple Susceptibility Loci. *Nat Genet* **42**, 978–84 (2010).
63. Howie, B. N., Donnelly, P. & Marchini, J. A Flexible and Accurate Genotype Imputation Method for the next Generation of Genome-Wide Association Studies. *PLoS Genet* **5**, e1000529 (2009).
64. Delaneau, O., Marchini, J. & Zagury, J. F. A Linear Complexity Phasing Method for Thousands of Genomes.” *Nat Methods* **9**, 179–81 (2012).
65. Viechtbauer, W. Conducting Meta-Analyses in R with the Metafor. *J Stat Software* **36**, 1–48 (2010).
66. McLaren, W. et al. The Ensembl Variant Effect Predictor. *Genome Biol* **17**, 122 (2016).
67. Martín-Antoniano, I., Alonso, A., Madrid, M., López De Maturana, E. & Malats, N. DoriTool: A Bioinformatics Integrative Tool for Post-Association Functional Annotation. *Public Health Genomics* **20**, 126–35 (2017).
68. Ardlie, K. G. et al. The Genotype-Tissue Expression (GTEx) Pilot Analysis: Multitissue Gene Regulation in Humans. *Science* **348**, 648–60 (2015).
69. Gong, J. et al. PancanQTL: Systematic Identification of Cis -EQTLs and Trans -EQTLs in 33 Cancer Types.” *Nucleic Acids Res* **46**, D971–76 (2018).
70. Sun, B. B. et al. Genomic Atlas of the Human Plasma Proteome. *Nature* **558**, 73–79 (2018).
71. Sloan, C. A. et al. ENCODE Data at the ENCODE Portal. *Nucleic Acids Res* **44**, D726–32 (2016).

72. Watanabe, K., Taskesen, E., Van Bochoven, A. & Posthuma, D. Functional Mapping and Annotation of Genetic Associations with FUMA. *Nat Commun* **8**, 1826 (2017).
73. Ernst, J. & Kellis, M. ChromHMM: Automating Chromatin-State Discovery and Characterization. *Nat Methods* **9**, 215-6 (2012).
74. Gao, J. et al. Integrative Analysis of Complex Cancer Genomics and Clinical Profiles Using the CBioPortal.” *Sci Signaling* **6**, p11 (2013).
75. Serra, F. et al. Automatic Analysis and 3D-Modelling of Hi-C Data Using TADbit Reveals Structural Features of the Fly Chromatin Colors. *PLoS Comput Biol* **13**, e1005665 (2017).

706

707 **ACKNOWLEDGEMENTS**

708 The authors are thankful to the patients, coordinators, field and administrative workers,  
709 and technicians of the European Study into Digestive Illnesses and Genetics (PanGenEU)  
710 and the Spanish Bladder Cancer (SBC/EPICURO) studies. We also thank Marta Rava,  
711 former member of the GMEG-CNIO, Guillermo Pita and Anna González-Neira from  
712 CGEN-CNIO, and Joe Dennis and Laura Fachal from the University of Cambridge, for  
713 genotyping PanGenEU samples, performing variant calling and SNP imputation, and  
714 editing data.

715

716 **FUNDING**

717 The work was partially supported by Fondo de Investigaciones Sanitarias (FIS), Instituto  
718 de Salud Carlos III, Spain (#PI061614, #PI11/01542, #PI0902102, #PI12/01635,  
719 #PI12/00815, #PI15/01573, #PI18/01347); Red Temática de Investigación Cooperativa  
720 en Cáncer, Spain (#RD12/0036/0034, #RD12/0036/0050, #RD12/0036/0073); Fundación  
721 Científica de la AECC, Spain; European Cooperation in Science and Technology - COST  
722 Action #BM1204: EUPancreas. EU-6FP Integrated Project (#018771-MOLDIAG-  
723 PACA), EU-FP7-HEALTH (#259737-CANCERALIA, #256974-EPC-TM-Net);  
724 Associazione Italiana Ricerca sul Cancro (12182); Cancer Focus Northern Ireland and  
725 Department for Employment and Learning; and ALF (#SLL20130022), Sweden;  
726 Pancreatic Cancer Collective (PCC): Lustgarten Foundation & Stand-Up to Cancer  
727 (SU2C #6179); Intramural Research Program of the Division of Cancer Epidemiology  
728 and Genetics, National Cancer Institute, USA; PANC4 GWAS RO1CA154823; NCI,  
729 US-NIH (#HHSN261200800001E).

730

731 **COMPETING INTERESTS STATEMENT**

732 We declare no competing interests

733 **AUTHOR CONTRIBUTIONS**

734 Study conception: **NM, ELM.**

735 Design of the work: **ELM, JAR, DE, MAMR, FXR.**

736 Data acquisition: **EMM, PGR, RTL, AC, MH, MI, XM, ML, CWM, JP, MOR, BMB,**

737 **AT, AF, LMB, TCJ, LDM, TG, WG, LS, LA, LC, JB, EC, LI, JK, NK, MM, JM,**

738 **DOD, AS, WY, JY, PanGenEU Investigators, MGC, MK, NR, DS, SBC/EPICURO**

739 **Investigators, DA, AAA, LBF, PMB, PB, BBM, JB, FC, MD, SG, JMG, PJG, MG,**

740 **LLM, LD, NRN, UP, GMP, HAR, MJS, XOS, LDT, KV, WZ, SC, BMW, RZSS,**

741 **APK, LA, FXR, NM.**

742 Data analysis: **ELM, JAR, LA, OL.**

743 Interpretation of data: **ELM, JAR, LA, OL, EMM, MAMR, FXR, NM.**

744 Creation of new software used in the work: **ELM, LA, JAR, OL, MAMR.**

745 To have drafted the work or substantively revised it: **ELM, JAR, LA, OL, TCJ, UP,**

746 **HAR, APK, LA, MAMR, FXR, NM.**

747 To have approved the submitted version (and any substantially modified version that  
748 involves the author's contribution to the study): **ALL AUTHORS**

749 To have agreed both to be personally accountable for the author's own contributions and

750 to ensure that questions related to the accuracy or integrity of any part of the work, even

751 ones in which the author was not personally involved, are appropriately investigated,

752 resolved, and the resolution documented in the literature: **ALL AUTHORS.**

753 **MAIN FIGURE AND LEGENDS**

754 **Figure 1.** Overview of the approaches adopted in this study to identify new pancreatic  
755 cancer susceptibility regions.

756

757 **Figure 2.** Zoom plot of the 8q24.21 CASC8 (cancer Susceptibility 8) region and linkage  
758 disequilibrium pattern of the PanGenEU GWAS prioritized variants.

759

760 **Figure 3.** Network of traits in GWAS catalog enriched with the genes prioritized in the  
761 PanGenEU GWAS.

762

763 **Figure 4.** Scatterplot of the local Moran's index (LMI) obtained in the 2D approach and  
764 the  $-\log_{10} p$ -value obtained in the GWAS analysis (1D approach).

765

766 **Figure 5.** Scatterplots of the  $-\log_{10} p$ -values, local Moran's index (LMI) values and odds  
767 ratios (OR) for three genomic regions prioritized based on their LMI value. Highlighted  
768 regions show the hits identified in the 2D, but not in the 1D approach.

769

770 **Figure 6.** Three-dimensional genome organization in healthy and PANC-1 cells and  
771 association results corresponding to the genomic region around *XBPI* using the standard  
772 GWAS and 2D approaches. A) Coverage-normalized Hi-C maps of healthy samples and  
773 PANC-1 cells at 40Kb resolution. Green ellipses highlight the interaction between the  
774 region harboring four Local Moran's Index (LMI)-selected SNPs and the *XBPI* promoter.  
775 B) Tracks of the ChromHMM Chromatin for 8 states in healthy pancreas, PANC-1 cells,  
776 and a Pancreatic Intraepithelial Neoplasia 1B. Promoters are colored in light purple,  
777 strong enhancers in dark green and weak enhancers in yellow. Note that the strong  
778 enhancer in the target region is lost in the PANC-1 and PanIN-1B samples, compared to

779 the healthy samples. C) UCSC tracks of H3K27ac, an enhancer-associated mark, and arcs  
780 linking significant interactions called by Homer. Interactions in healthy pancreas samples  
781 are in green and those in PANC-1 and in the PanIN-1B sample are in purple. Red arc  
782 represents the interaction between LMI-prioritized SNPs and the *XBPI* promoter  
783 (highlighted region in Hi-C map in A). D) Scatterplots of SNPs in region  
784 chr22:28,400,000-29,600,000 (hg19) and their  $-\log_{10}$  (p-value), LMI and odds ratio. Bait  
785 and target chromatin interaction regions are highlighted in yellow and blue, respectively.

**Figure 1**

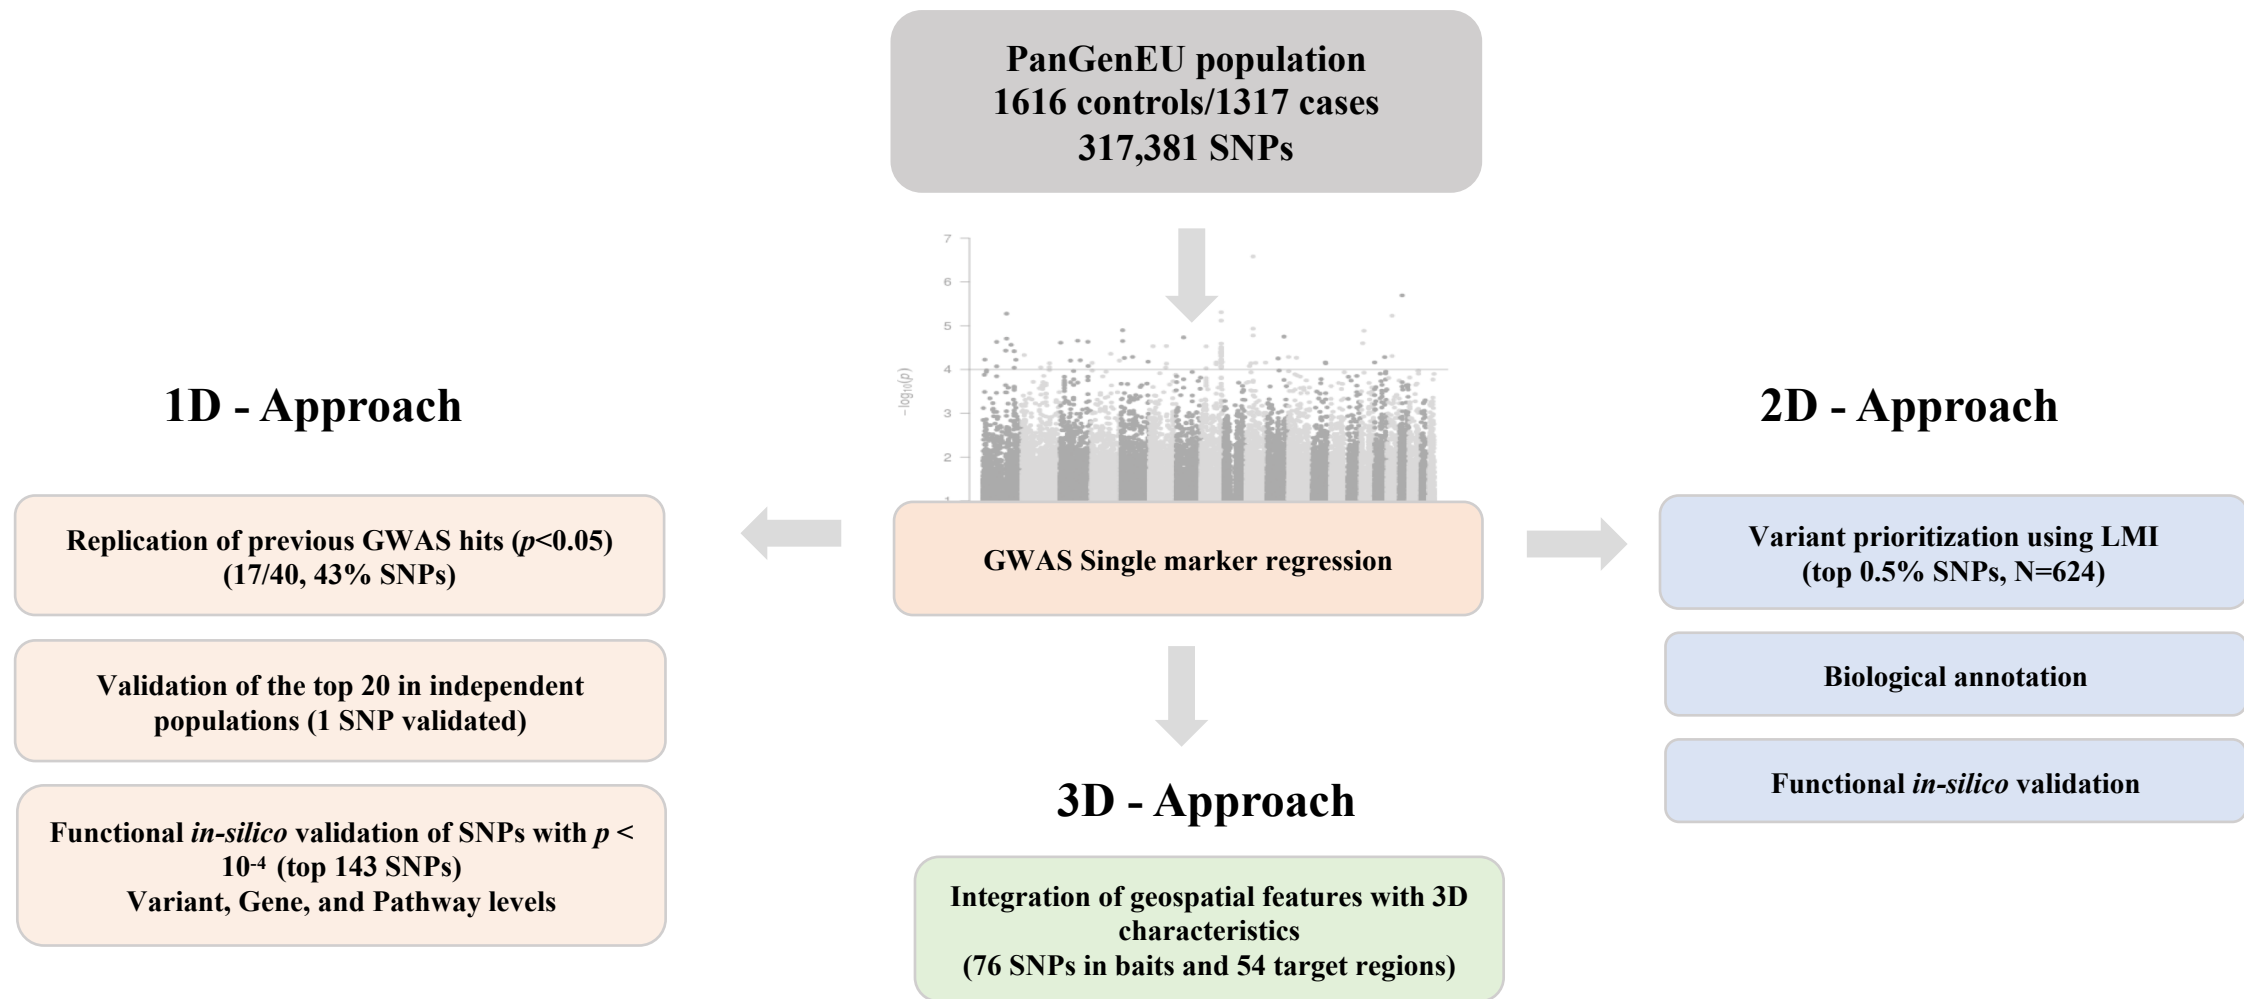



**Figure 2**

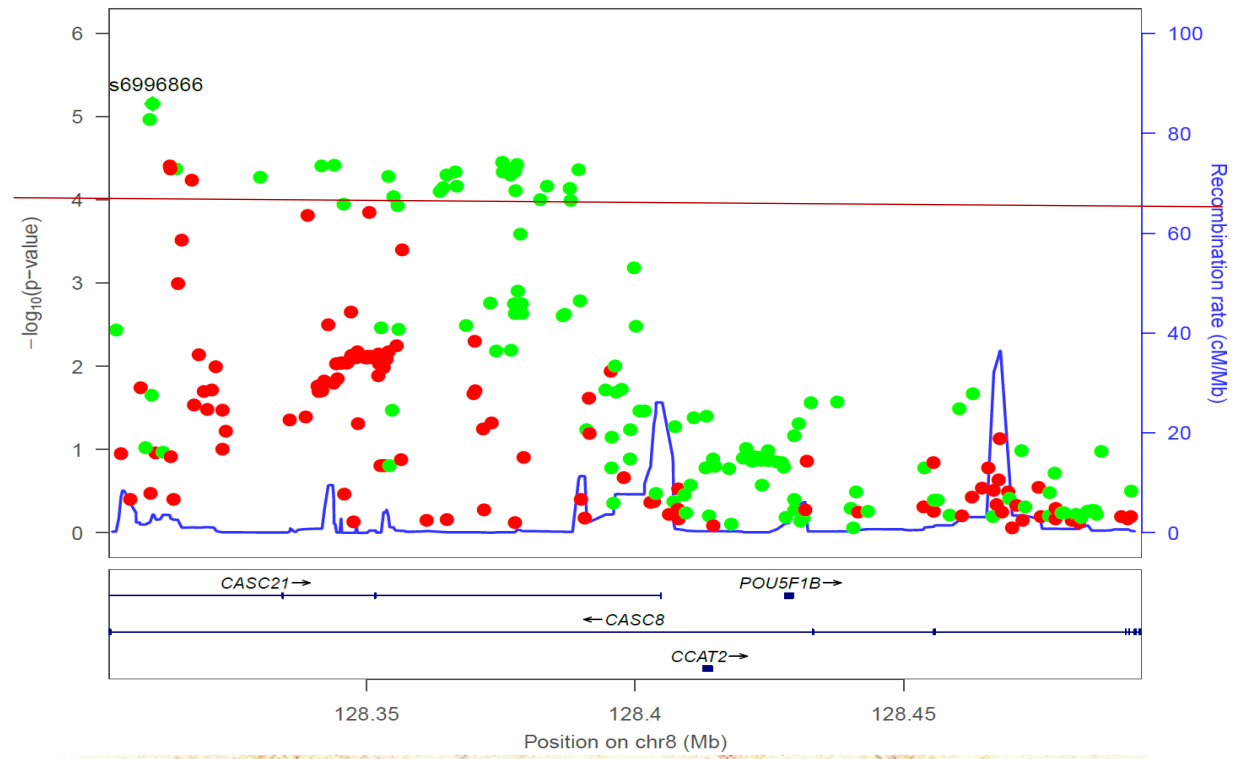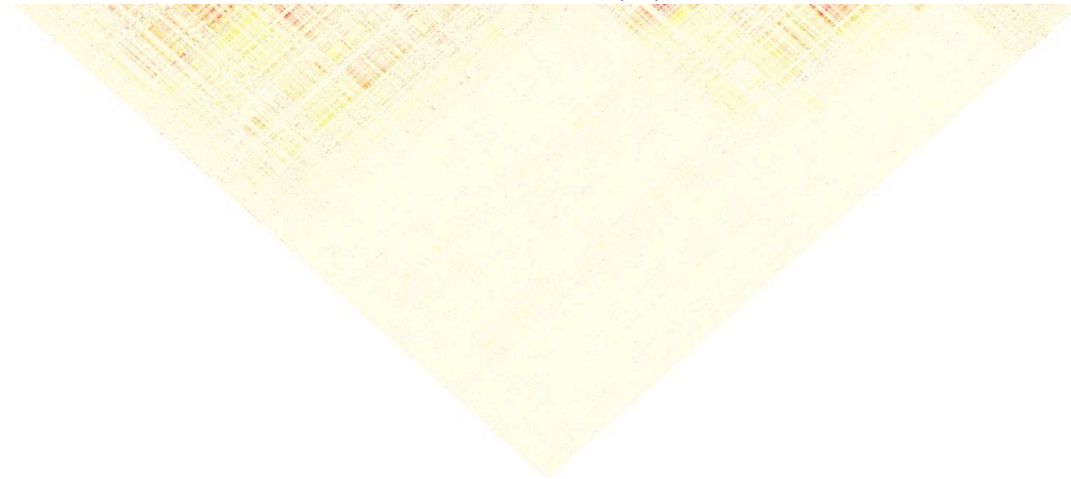

Figure 3

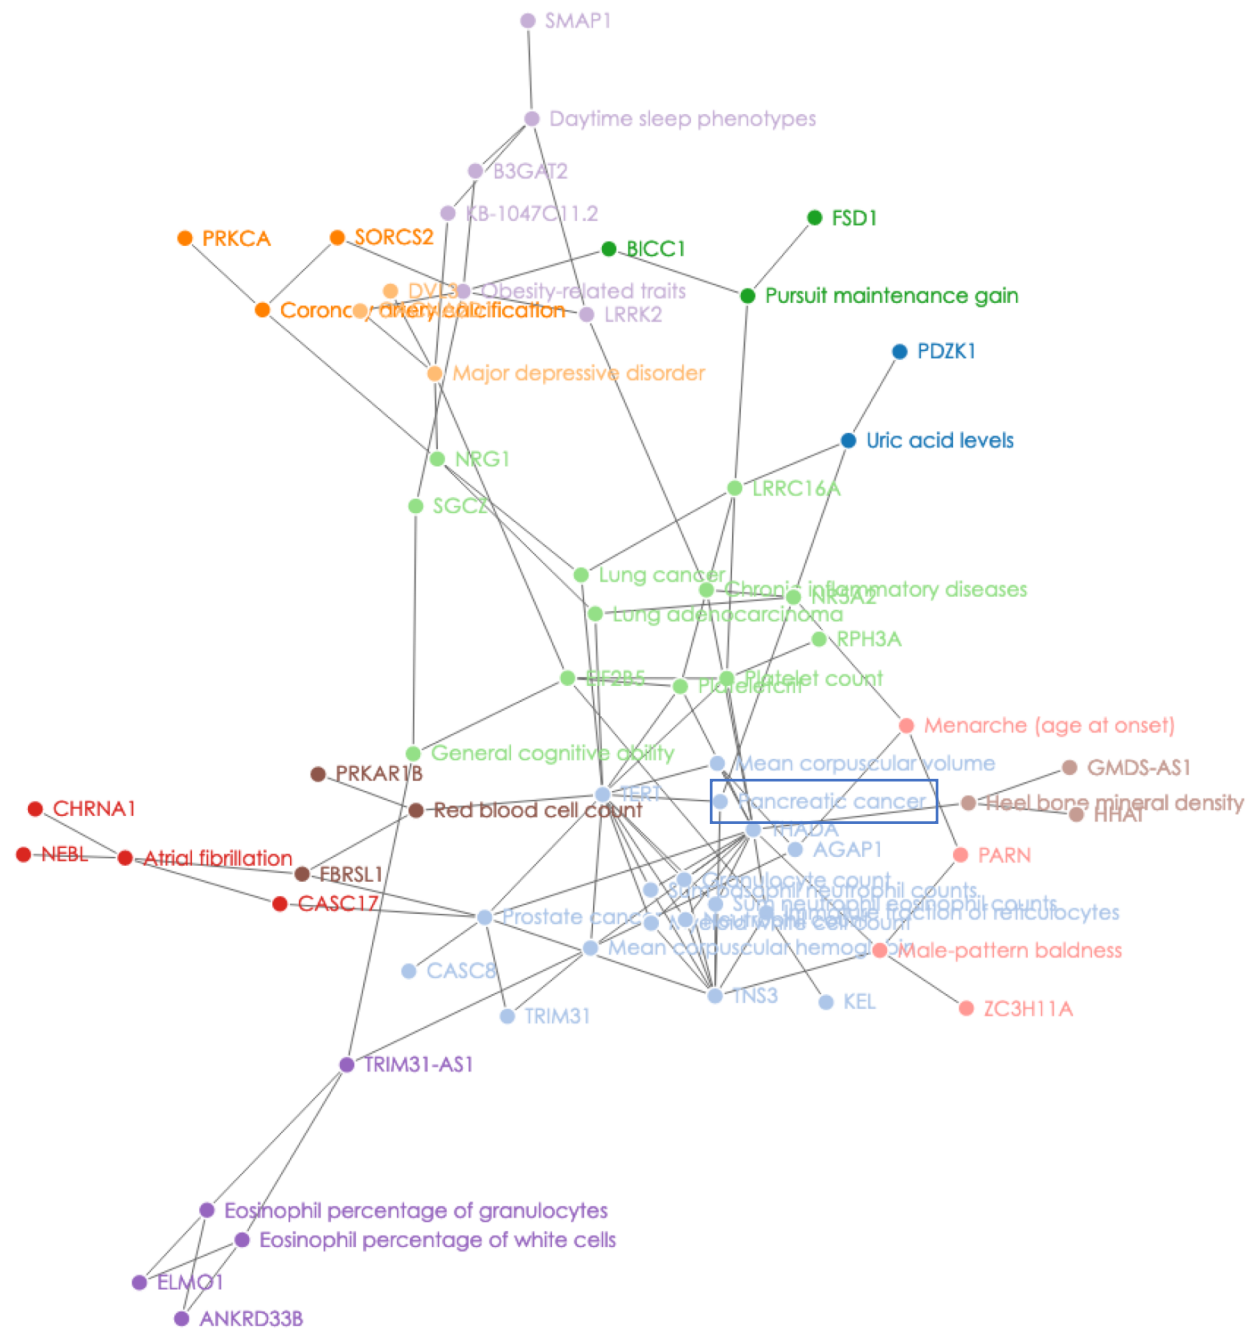

**Figure 4**

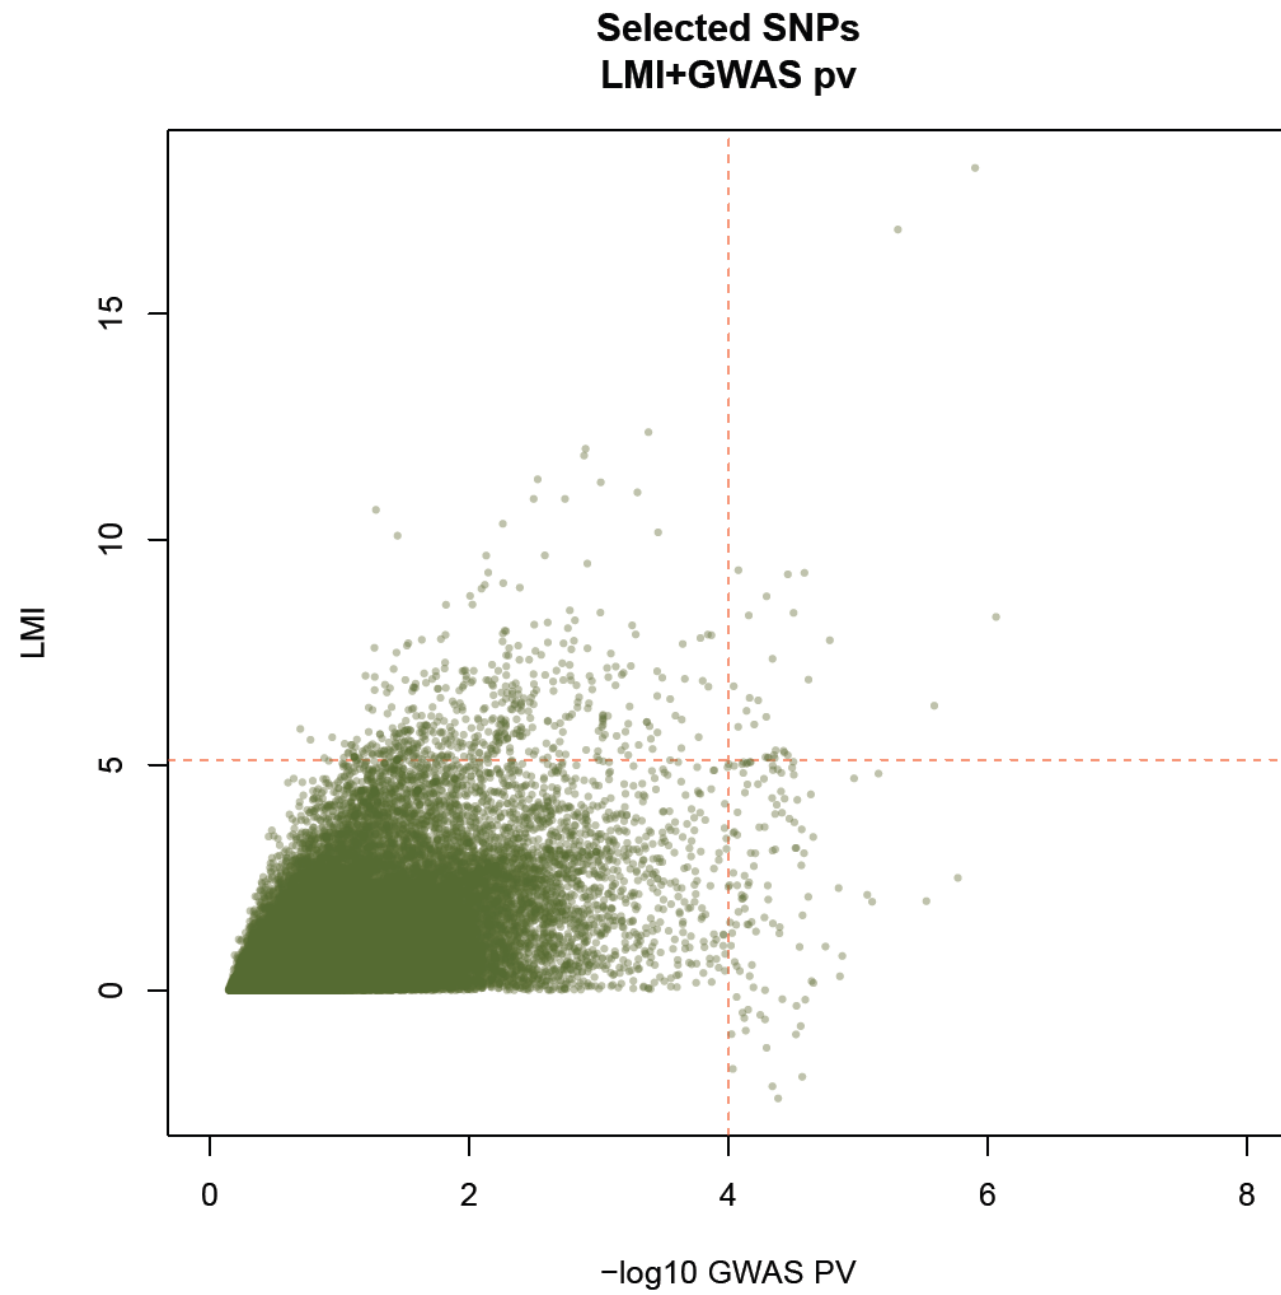

**Figure 5**

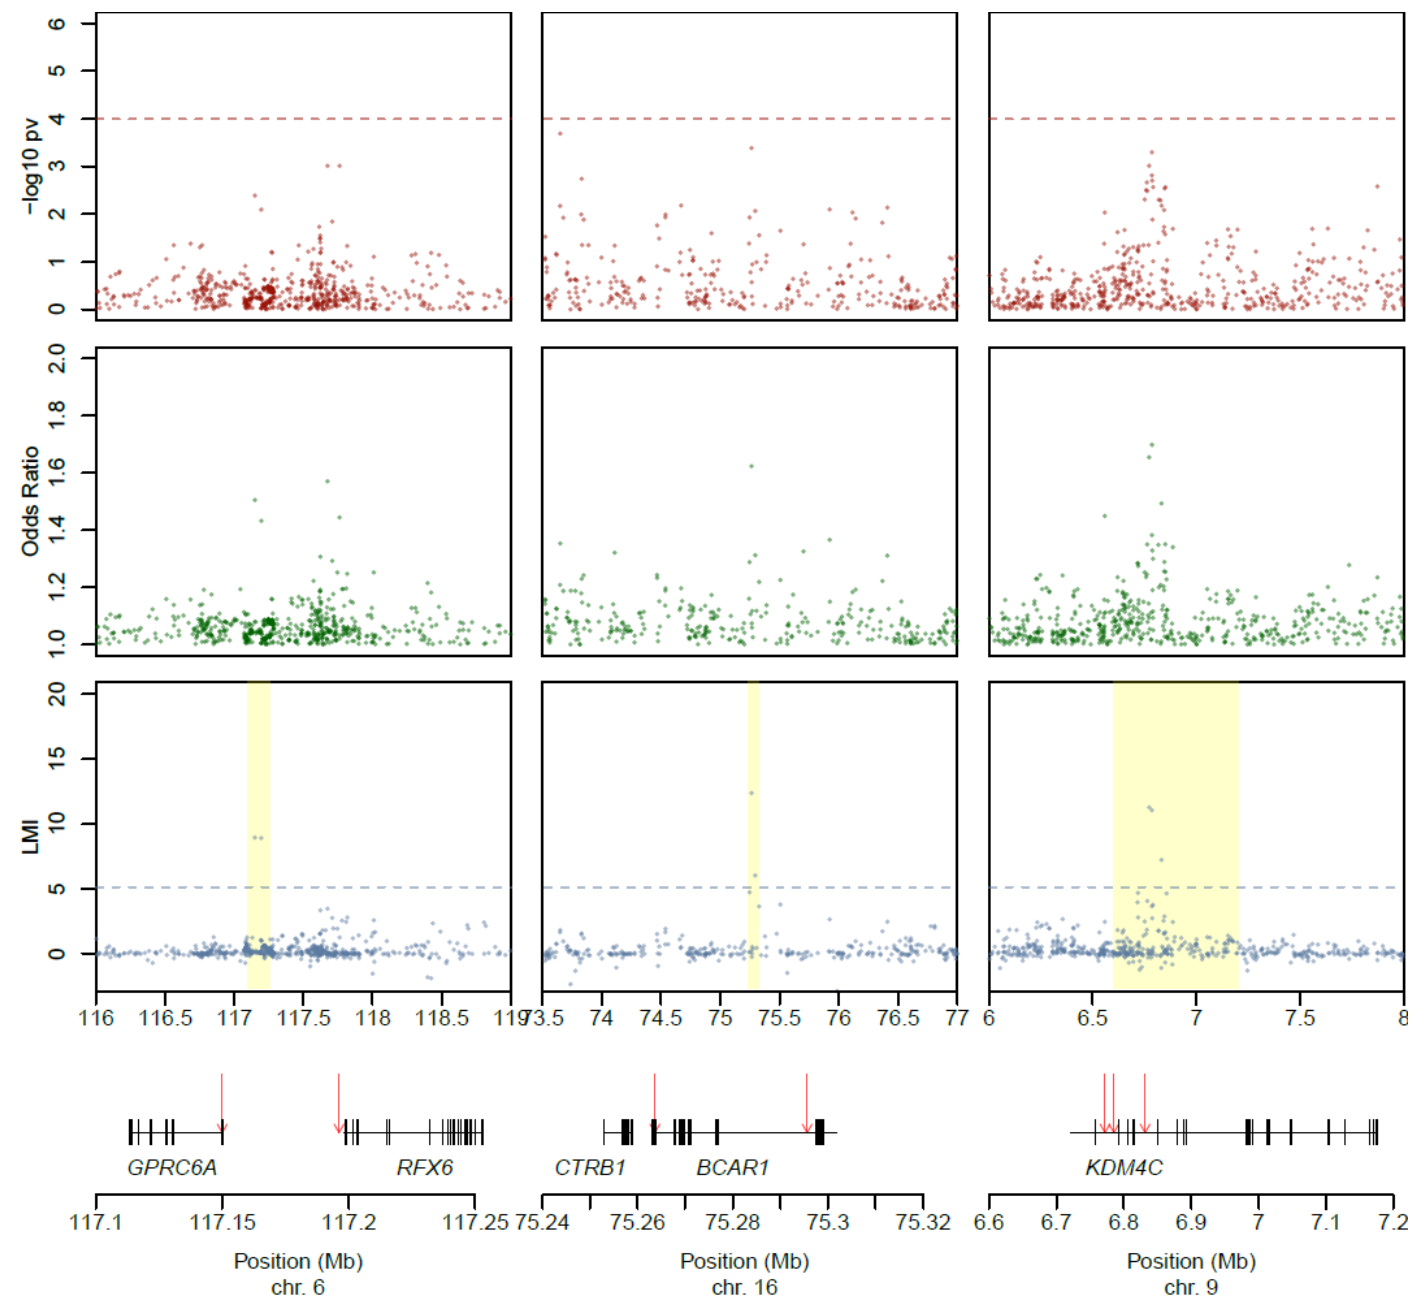

Figure 6

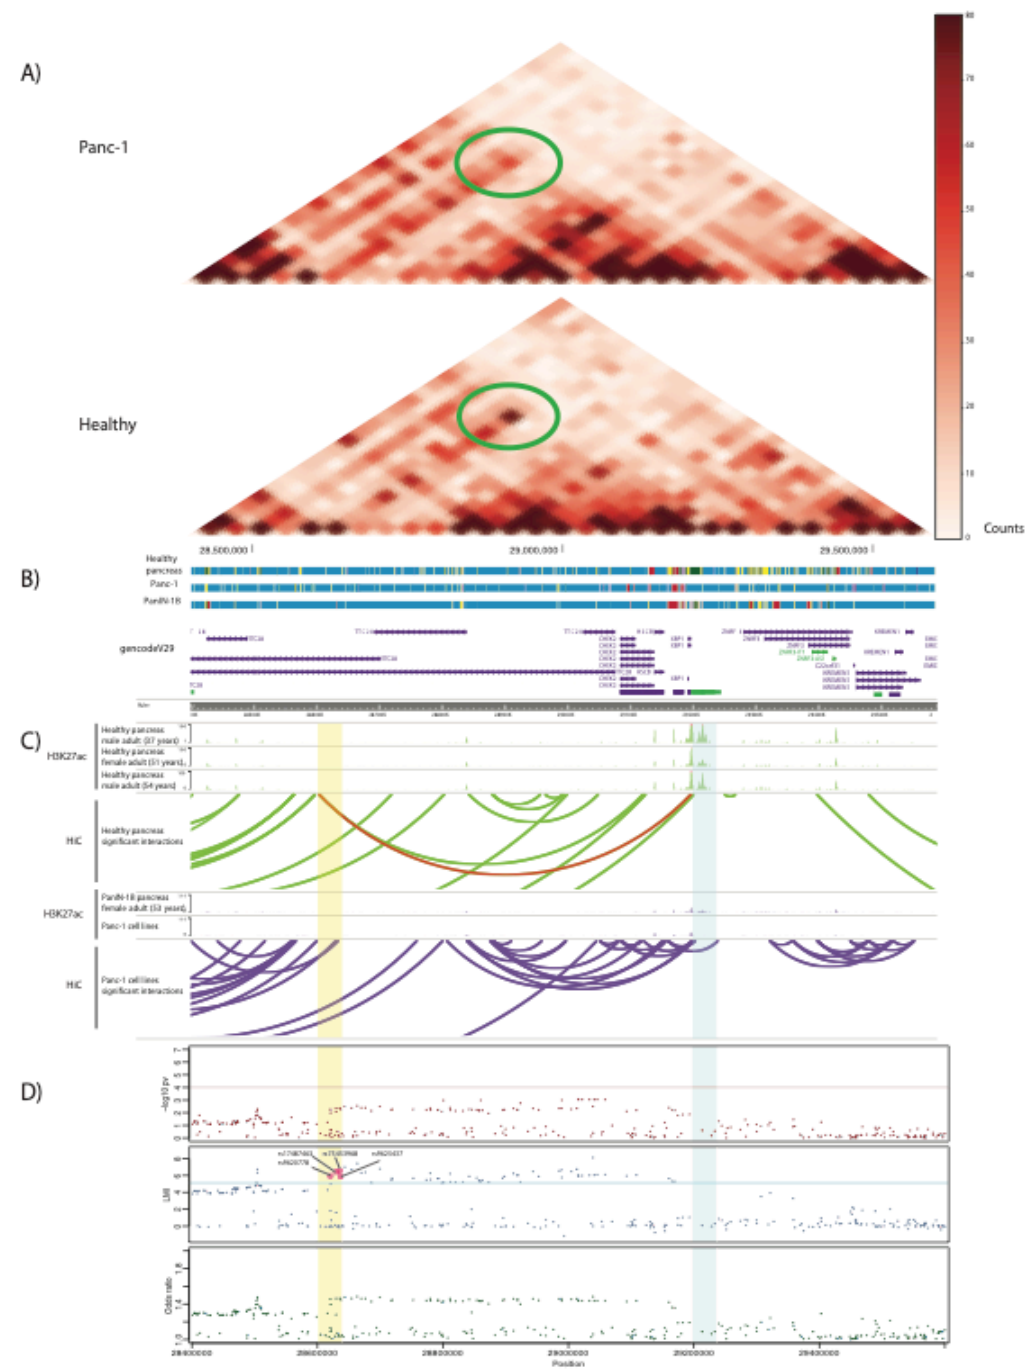

Source: https://www.biorxiv.org/content/10.1101/2020.02.11.941351v1.full.pdf
